# Supplementary material for: A thermodynamic model of the surface hydroxylation of γ-Al2O3
Source: Royal Society of Chemistry journal article supplement (doi:10.1039/d4cp01968g), 2024-01-01
Supplement: d4cp01968g1.pdf [file d4cp01968g1.pdf]

## Supporting Information

for

### A Thermodynamic Model of the Surface Hydroxylation of $\gamma$ - $\text{Al}_2\text{O}_3$

Ying Ma, Fan Tang, Ziyi Liu, Junqing Li, Haowei Wang, Fan Wu, Dongqi Wang\*,  
An-Hui Lu\*

State Key Laboratory of Fine Chemicals, Liaoning Key Laboratory for Catalytic  
Conversion of Carbon Resources, School of Chemical Engineering, School of  
Chemistry, Dalian University of Technology, Dalian 116024, China

E-mail: wangdq@dlut.edu.cn (D.W) , anhuilu@dlut.edu.cn

**The acidity of surface Lewis sites.**  $\text{NH}_3$  molecule was used as basic probe to assess the Lewis acidity of the surface site by evaluating its adsorption strength on these sites. The magnitude of the adsorption energy of  $\text{NH}_3$  molecule on the surface was used as the descriptor to measure the acidity, and the more negative the energy, the more acidic the site. The results are collected in the Table S1 and Figure S1, which indicated that the lower the coordination number, the more acidic Lewis is, as expected. It is noted that the  $\text{Al}_{\text{IVa}}$  and  $\text{Al}_{\text{IVa}'}$  of  $\text{Al}_2\text{O}_3(110)$  are equivalent, and the  $\text{Al}_{\text{Vc}}$  and  $\text{Al}_{\text{Vd}}$  sites of  $\text{Al}_2\text{O}_3(100)$  are equivalent. Thus, we disregarded the acidity of the  $\text{Al}_{\text{IVa}'}$  and  $\text{Al}_{\text{Vd}}$  sites. On the (110) surface, there are three types of sites accessible for  $\text{NH}_3$ , i.e. the  $\text{Al}_{\text{III}}$  site, and the  $\text{Al}_{\text{IVa}}$  and  $\text{Al}_{\text{IVb}}$  sites: The adsorption of  $\text{NH}_3$  on the  $\text{Al}_{\text{III}}$  site is much stronger ( $-213 \text{ kJ mol}^{-1}$ ) than on the two  $\text{Al}_{\text{IVa}}$  and  $\text{Al}_{\text{IVb}}$  sites, suggesting that the  $\text{Al}_{\text{III}}$  site has the strongest Lewis acidity. The adsorption energies on  $\text{Al}_{\text{IVa}}$  and  $\text{Al}_{\text{IVb}}$  sites are close with a difference of  $7 \text{ kJ mol}^{-1}$ , indicating their similar acidity. Thus, the acidity of the three sites can be ranked as  $\text{Al}_{\text{III}} > \text{Al}_{\text{IVa}} > \text{Al}_{\text{IVb}}$ . On the (100) surface the adsorption energy of  $\text{NH}_3$  on the  $\text{Al}_{\text{Va}}$  site ( $-134.1 \text{ kJ mol}^{-1}$ ) is the lowest, showing the strongest acidity. When adsorbed on the other two sites ( $\text{Al}_{\text{Vb}}$  and  $\text{Al}_{\text{Vc}}$ ), the adsorption energies are same (by  $-103 \text{ kJ mol}^{-1}$ ), which is the consequence of the similar adsorption mode of  $\text{NH}_3$  on these two sites (Figure 1b) and their similar acidity.

Figure S1. The binding strength of  $\text{NH}_3$  on the Al sites of  $\text{Al}_2\text{O}_3$  surfaces: (a)  $\text{Al}_2\text{O}_3(110)$ , and (b)  $\text{Al}_2\text{O}_3(100)$  surfaces.

Figure S2. Total density of states (TDOS) of  $\gamma$ - $\text{Al}_2\text{O}_3$  bulk model.

Figure S3. Atom-projected density of states (PDOS) of  $\gamma$ - $\text{Al}_2\text{O}_3$  bulk model.

Figure S4. Simulated XRD pattern of  $\gamma$ - $\text{Al}_2\text{O}_3$  bulk model.

Table S1.  $\text{NH}_3$  adsorption on Al sites of  $\text{Al}_2\text{O}_3$  (110) and (100) surfaces

Table S2. Experimental IR-bands for CO adsorbed on  $\gamma$ - $\text{Al}_2\text{O}_3$ .

The coordinates of  $\gamma$ - $\text{Al}_2\text{O}_3$  bulk model.

The coordinates of  $\gamma$ - $\text{Al}_2\text{O}_3$  s0(110) model.

The coordinates of  $\gamma$ - $\text{Al}_2\text{O}_3$  s0(100) model.

The coordinates of s1a (110) model.

The coordinates of s1b (110) model.

The coordinates of s1c(110) model.

The coordinates of s2a(110) model.

The coordinates of s2b(110) model.

The coordinates of s2c(110) model.  
 The coordinates of s3a(110) model.  
 The coordinates of s3b(110) model.  
 The coordinates of s3c(110) model.  
 The coordinates of s3d(110) model.  
 The coordinates of s1a(100) model.  
 The coordinates of s1b(100) model.  
 The coordinates of s1c(100) model.  
 The coordinates of s2a(100) model.  
 The coordinates of s2b(100) model.  
 The coordinates of s2c(100) model.  
 The coordinates of s2d(100) model.  
 The coordinates of s3a(100) model.  
 The coordinates of s3b(100) model.  
 The coordinates of s4a(100) model.

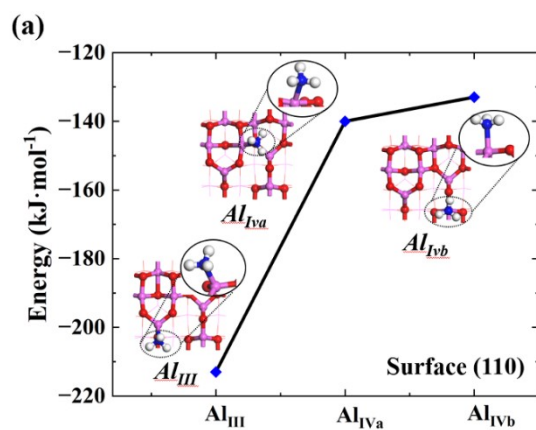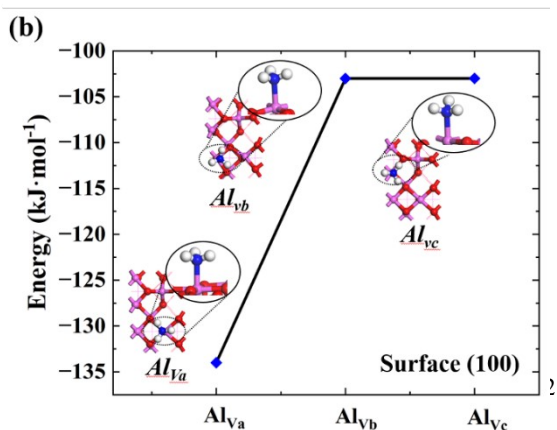

Figure S1. The binding strength of NH<sub>3</sub> on the Al sites of Al<sub>2</sub>O<sub>3</sub> surfaces: (a) Al<sub>2</sub>O<sub>3</sub>(110), and (b) Al<sub>2</sub>O<sub>3</sub>(100) surfaces

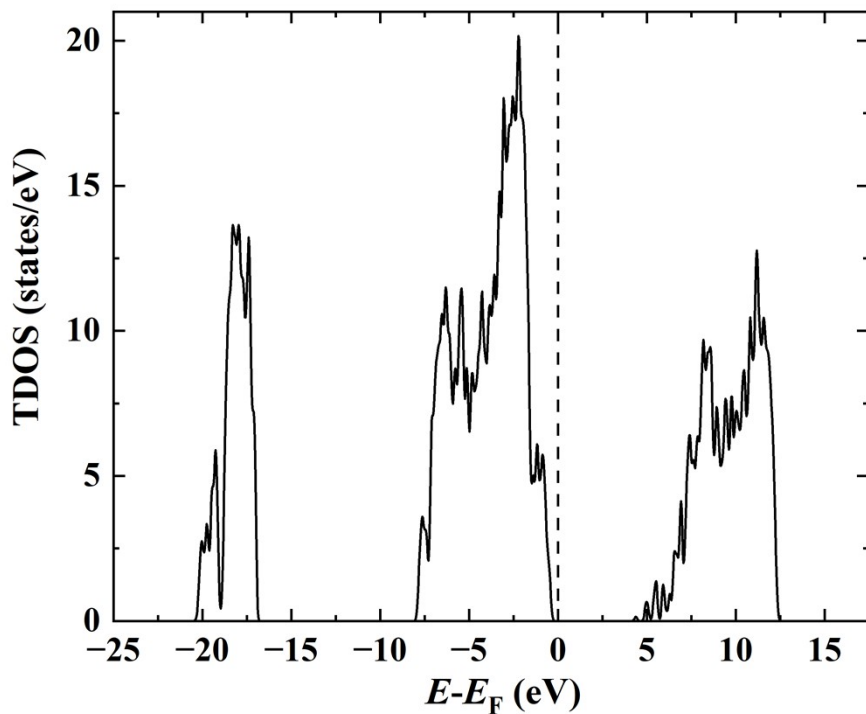

Figure S2. Total density of states (TDOS) of  $\gamma$ -Al<sub>2</sub>O<sub>3</sub> bulk model.

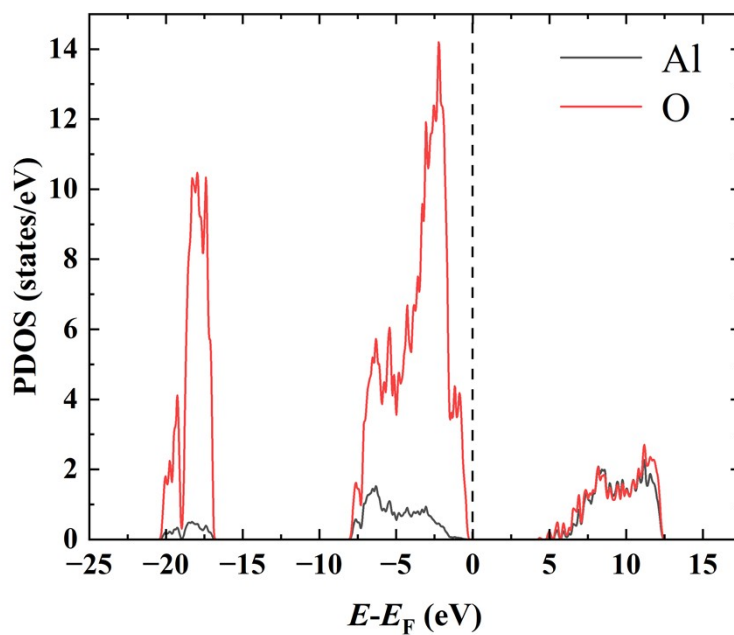

Figure S3. Atom-projected density of states (PDOS) of  $\gamma$ -Al<sub>2</sub>O<sub>3</sub> bulk model.

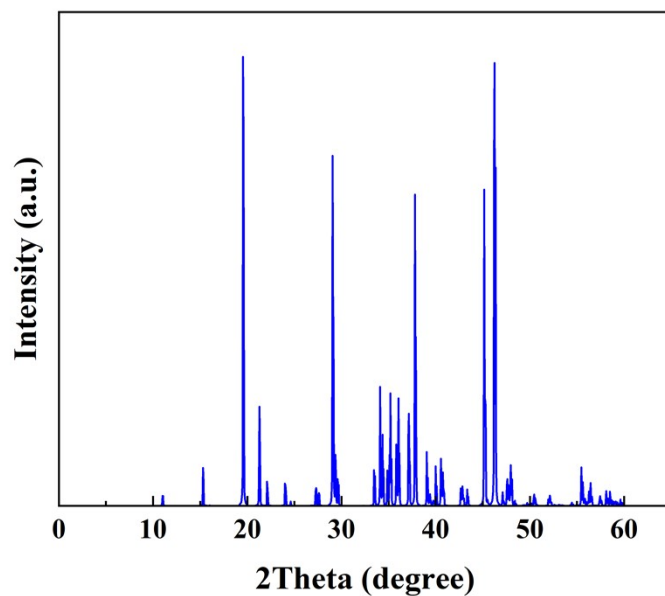

Figure S4. Simulated XRD pattern of  $\gamma$ -Al<sub>2</sub>O<sub>3</sub> bulk model.

Table S1. NH<sub>3</sub> adsorption on Al sites of Al<sub>2</sub>O<sub>3</sub> (110) and (100) surfaces

| Surface | Adsorption site   | $d_{\text{Al-N}}$ (Å) | $E_{\text{ads}}$ (kJ mol <sup>-1</sup> ) |
|---------|-------------------|-----------------------|------------------------------------------|
| (110)   | Al <sub>III</sub> | 1.98                  | -213                                     |
|         | Al <sub>IVa</sub> | 2.04                  | -140                                     |
|         | Al <sub>IVb</sub> | 2.03                  | -133                                     |
| (100)   | Al <sub>Va</sub>  | 2.05                  | -134                                     |
|         | Al <sub>Vb</sub>  | 2.09                  | -103                                     |
|         | Al <sub>Vc</sub>  | 2.09                  | -103                                     |

Table S2. Experimental IR-bands for CO adsorbed on  $\gamma$ -Al<sub>2</sub>O<sub>3</sub>.

| $\omega_{\text{exp}}$ ( $\Delta_{\text{exp}}$ ) (cm <sup>-1</sup> ) | Exp.assignment <sup>1, 2</sup> |
|---------------------------------------------------------------------|--------------------------------|
| 2240-2220(+97/+57)                                                  | Defects                        |
| 2200-2190(+57/47)                                                   | III                            |
| 2184-2173(+41/+30)                                                  | IV                             |
| 2165-2155(+22/+12)                                                  | VI                             |
| 2153-2148(+10/+5)                                                   | V                              |

**The coordinates of  $\gamma$ -Al<sub>2</sub>O<sub>3</sub> bulk model**

1.00000000000000

5.5359235677336533 -0.0000000714350437 -0.0025108570170892

-0.0000001076776353 8.3405291938258710 -0.0000000330471680

-0.0859723627445829 -0.0000000307123005 8.0211835243102811

Al O

16 24

Direct

0.3673445374298889 0.0753913177629822 0.6131037137299438

0.6326554714178915 0.9246086832249496 0.3868962852047740

0.6326554544670197 0.5753913028776683 0.3868962444724654

0.3673445513247603 0.4246086960351891 0.6131037540021673

0.1167661798718265 0.5785231810136373 0.8625167898213593

0.8832338267941557 0.4214768231828204 0.1374832137103076

0.8832338220848867 0.0785231727623464 0.1374831921781556

0.1167661817553195 0.9214768255412674 0.8625168020544548

0.3781075397524745 0.7500000107054708 0.1257256420999684

0.6218924654629234 0.2499999899200576 0.8742743567198210

0.8757306899072365 0.7500000022636198 0.1251491228739210

0.1242693112481040 0.2499999996833508 0.8748508745583087

0.6157579360533731 0.7499999770834738 0.7459501279133142

0.3842420694263650 0.2500000208887099 0.2540498715625564

0.8683941972898863 0.2499999884087369 0.4991414851943557

0.1316058108591881 0.7500000138690925 0.5008585173676603

0.8866805559407824 0.4064753417113720 0.8974270111389361

0.1133194427542209 0.5935246509581029 0.1025729880365799

0.1133194648829708 0.9064753425040118 0.1025729895596682

0.8866805551574805 0.0935246600581042 0.8974270105611416

0.6071541179391434 0.9184023062423323 0.6143414038544868

0.3928458877802110 0.0815976912148827 0.3856585966235200

0.3928458440215748 0.4184022715840489 0.3856587362150686

0.6071541578154858 0.5815977301388455 0.6143412629569709

0.3583420378919491 0.4066988031358899 0.8551698692420929

0.6416579760136016 0.5933011979757953 0.1448301241800520

0.6416579941749391 0.9066987951479305 0.1448301856852521

0.3583420088230017 0.0933012045611084 0.8551698144375337

0.1342607589743655 0.9175241615380599 0.6364260673013606

0.8657392474633512 0.0824758421453967 0.3635739253091531

0.8657392425015750 0.4175241723059449 0.3635740118581212

0.1342607658132233 0.5824758449230056 0.6364260014813267



0.00000000E+00 0.00000000E+00 0.00000000E+00  
0.00000000E+00 0.00000000E+00 0.00000000E+00  
0.00000000E+00 0.00000000E+00 0.00000000E+00  
0.00000000E+00 0.00000000E+00 0.00000000E+00  
0.00000000E+00 0.00000000E+00 0.00000000E+00

**The coordinates of  $\gamma$ -Al<sub>2</sub>O<sub>3</sub> s0(110) model**

1.0000000000000000

8.3437995910999998 0.0000000000000000 0.0000000000000000  
0.0000000000000000 8.0254001617000004 0.0000000000000000  
0.0000000000000000 0.0000000000000000 24.8878993987999984

Al O

16 24

Selective dynamics

Direct

|                    |                    |                    |   |   |   |
|--------------------|--------------------|--------------------|---|---|---|
| 0.0698238377015936 | 0.6134038929581769 | 0.2428356483887615 | T | T | T |
| 0.9246100189999993 | 0.3976500030000025 | 0.0860299989999973 | F | F | F |
| 0.5753899810000007 | 0.3976500030000025 | 0.0860299989999973 | F | F | F |
| 0.4301761408918040 | 0.6134039002108533 | 0.2428355957877695 | T | T | T |
| 0.5827844173512409 | 0.8687944202240446 | 0.1979009408492679 | T | T | T |
| 0.4214699859999982 | 0.1462399959999985 | 0.1417900029999970 | F | F | F |
| 0.0785299989999970 | 0.1462399959999985 | 0.1417900029999970 | F | F | F |
| 0.9172155942398524 | 0.8687943888234366 | 0.1979009514254522 | T | T | T |
| 0.7500000059901997 | 0.1407450896781373 | 0.2428220436092425 | T | T | T |
| 0.2500000000000000 | 0.8851500150000007 | 0.0836400020000028 | F | F | F |
| 0.7500000000000000 | 0.1339599940000014 | 0.1401000019999969 | F | F | F |
| 0.2499999619150052 | 0.8922511603015536 | 0.2017149505945133 | T | T | T |
| 0.7500000000000000 | 0.7569500210000015 | 0.0822699960000008 | F | F | F |
| 0.2499999451273337 | 0.3084867816641775 | 0.2513331751893689 | T | T | T |
| 0.2500000000000000 | 0.5080299970000013 | 0.1385000049999974 | F | F | F |
| 0.7500000140750985 | 0.4897272970236625 | 0.2026167921440816 | T | T | T |
| 0.4065400060000002 | 0.9061499829999988 | 0.1425700039999995 | F | F | F |
| 0.5881962938104262 | 0.1147032292209145 | 0.1920157725833679 | T | T | T |
| 0.9118037099869263 | 0.1147032226696469 | 0.1920157510028447 | T | T | T |
| 0.0934600009999969 | 0.9061499829999988 | 0.1425700039999995 | F | F | F |
| 0.9184399840000026 | 0.6252700089999976 | 0.0803600030000027 | F | F | F |
| 0.0848541655918334 | 0.4180613235358231 | 0.2718510768886389 | T | T | T |
| 0.4151460122500314 | 0.4180611160563437 | 0.2718508608323527 | T | T | T |
| 0.5815600159999974 | 0.6252700089999976 | 0.0803600030000027 | F | F | F |
| 0.4153878830778492 | 0.8403466776208970 | 0.2471281224864339 | T | T | T |
| 0.5932800169999979 | 0.1555200069999998 | 0.0880500000000026 | F | F | F |
| 0.9067199830000021 | 0.1555200069999998 | 0.0880500000000026 | F | F | F |
| 0.0846120905270666 | 0.8403466798376769 | 0.2471281869085377 | T | T | T |
| 0.9058477205009887 | 0.6367536417504406 | 0.2005103006344014 | T | T | T |





|                |                |                |
|----------------|----------------|----------------|
| 0.00000000E+00 | 0.00000000E+00 | 0.00000000E+00 |

**The coordinates of  $\gamma\text{-Al}_2\text{O}_3$  s0(100) model**

|                    |                    |                     |
|--------------------|--------------------|---------------------|
| 1.0000000000000000 |                    |                     |
| 5.5376000404000001 | 0.0000000000000000 | 0.0000000000000000  |
| 0.0000000000000000 | 8.3437995910999998 | 0.0000000000000000  |
| 0.0000000000000000 | 0.0000000000000000 | 21.3780994415000016 |

Al O  
16 24

Selective dynamics

Direct

|                    |                    |                    |   |   |   |
|--------------------|--------------------|--------------------|---|---|---|
| 0.3464976272088440 | 0.0912567893220804 | 0.3323458580770468 | T | T | T |
| 0.6144000290000022 | 0.9425100090000029 | 0.2470500020000017 | F | F | F |
| 0.6144000290000022 | 0.5932899709999973 | 0.2470500020000017 | F | F | F |
| 0.3465376231868830 | 0.4443392010636161 | 0.3323229034489822 | T | T | T |
| 0.0518646287603409 | 0.6037438214145475 | 0.4220531140016250 | T | T | T |
| 0.8691099879999982 | 0.4393700059999972 | 0.1534200010000006 | F | F | F |
| 0.8691099879999982 | 0.0964300039999983 | 0.1534200010000006 | F | F | F |
| 0.0518767709573581 | 0.9319610994649153 | 0.4220237833525667 | T | T | T |
| 0.3641700149999991 | 0.7678999899999965 | 0.1490000040000012 | F | F | F |
| 0.6188381191431721 | 0.2678169542839973 | 0.4267292152638203 | T | T | T |
| 0.8617600199999984 | 0.7678999899999965 | 0.1487800029999988 | F | F | F |
| 0.1052261302856925 | 0.2678350445994213 | 0.4265122723457697 | T | T | T |
| 0.5572530243990456 | 0.7677454428549740 | 0.3880212956104773 | T | T | T |
| 0.3682200099999974 | 0.2678999899999965 | 0.1971399930000004 | F | F | F |
| 0.8483600019999997 | 0.2678999899999965 | 0.2891800109999991 | F | F | F |
| 0.1114099990000028 | 0.7678999899999965 | 0.2898299989999984 | F | F | F |
| 0.8750996678890928 | 0.4193638317707763 | 0.4422200149126537 | T | T | T |
| 0.0996799990000028 | 0.6113600130000023 | 0.1403300019999989 | F | F | F |
| 0.0996799990000028 | 0.9244400259999992 | 0.1403300019999989 | F | F | F |
| 0.8751348919847193 | 0.1162765638938948 | 0.4422314107144129 | T | T | T |
| 0.5761725247678307 | 0.9323531913073594 | 0.3337792947940911 | T | T | T |
| 0.3746199910000030 | 0.0994599980000004 | 0.2465900030000014 | F | F | F |
| 0.3746199910000030 | 0.4363400040000016 | 0.2465900030000014 | F | F | F |
| 0.5763038802610335 | 0.6032168816492504 | 0.3337896317050205 | T | T | T |
| 0.3448865178542292 | 0.4208821706937271 | 0.4266732964654212 | T | T | T |

|                    |                    |                    |   |   |   |
|--------------------|--------------------|--------------------|---|---|---|
| 0.6274499889999987 | 0.6111800070000015 | 0.1561799939999986 | F | F | F |
| 0.6274499889999987 | 0.9246199729999987 | 0.1561799939999986 | F | F | F |
| 0.3448868151766408 | 0.1147647511846388 | 0.4266247176520125 | T | T | T |
| 0.1027672768375795 | 0.9399704664719631 | 0.3388718413886856 | T | T | T |
| 0.8478800059999969 | 0.1003699970000014 | 0.2383099939999980 | F | F | F |
| 0.8478800059999969 | 0.4354299900000029 | 0.2383099939999980 | F | F | F |
| 0.1028485393205459 | 0.5957479351419910 | 0.3388888027825658 | T | T | T |
| 0.8323890005928505 | 0.7678581148593828 | 0.4320364468149127 | T | T | T |
| 0.1041899989999990 | 0.2678999899999965 | 0.1482400000000013 | F | F | F |
| 0.2832635844208799 | 0.7678130896526656 | 0.4365882715515338 | T | T | T |
| 0.6239399910000003 | 0.2678999899999965 | 0.1433500050000021 | F | F | F |
| 0.5942897341603919 | 0.2678380012432790 | 0.3413376904800806 | T | T | T |
| 0.3694800139999970 | 0.7678999899999965 | 0.2369000019999987 | F | F | F |
| 0.1165762075889757 | 0.2678482398866188 | 0.3372519705822394 | T | T | T |
| 0.8484500049999966 | 0.7678999899999965 | 0.2414699939999991 | F | F | F |

0.00000000E+00 0.00000000E+00 0.00000000E+00  
0.00000000E+00 0.00000000E+00 0.00000000E+00

|                |                |                |
|----------------|----------------|----------------|
| 0.00000000E+00 | 0.00000000E+00 | 0.00000000E+00 |

**The coordinates of s1a(110) model**

|                    |                    |                     |
|--------------------|--------------------|---------------------|
| 1.0000000000000000 |                    |                     |
| 8.3437995910999998 | 0.0000000000000000 | 0.0000000000000000  |
| 0.0000000000000000 | 8.0254001617000004 | 0.0000000000000000  |
| 0.0000000000000000 | 0.0000000000000000 | 24.8878993987999984 |

|    |    |   |
|----|----|---|
| Al | O  | H |
| 16 | 25 | 2 |

Selective dynamics

Direct

|                    |                    |                    |   |   |   |
|--------------------|--------------------|--------------------|---|---|---|
| 0.0752569465471947 | 0.6109496107602225 | 0.2426797379882677 | T | T | T |
| 0.9246100189999993 | 0.3976500030000025 | 0.0860299989999973 | F | F | F |
| 0.5753899810000007 | 0.3976500030000025 | 0.0860299989999973 | F | F | F |
| 0.4250538014162016 | 0.6208752160514120 | 0.2403320687333487 | T | T | T |
| 0.5824035095414509 | 0.8702899675877328 | 0.1970004799023042 | T | T | T |
| 0.4214699859999982 | 0.1462399959999985 | 0.1417900029999970 | F | F | F |
| 0.0785299989999970 | 0.1462399959999985 | 0.1417900029999970 | F | F | F |
| 0.9186062622804412 | 0.8661118799730976 | 0.1980114676060794 | T | T | T |
| 0.7505026482516741 | 0.1361595834904813 | 0.2428480803452218 | T | T | T |
| 0.2500000000000000 | 0.8851500150000007 | 0.0836400020000028 | F | F | F |
| 0.7500000000000000 | 0.1339599940000014 | 0.1401000019999969 | F | F | F |
| 0.2487140786695796 | 0.9005153599494463 | 0.2015698635921863 | T | T | T |
| 0.7500000000000000 | 0.7569500210000015 | 0.0822699960000008 | F | F | F |
| 0.2531876643929320 | 0.2699252356411259 | 0.2658788504555639 | T | T | T |
| 0.2500000000000000 | 0.5080299970000013 | 0.1385000049999974 | F | F | F |
| 0.7495971317636880 | 0.4900591722685537 | 0.2016748585137150 | T | T | T |
| 0.4065400060000002 | 0.9061499829999988 | 0.1425700039999995 | F | F | F |
| 0.5889010477546560 | 0.1142315975191053 | 0.1921212249674439 | T | T | T |
| 0.9105316834456563 | 0.1178772752656740 | 0.1927253827550811 | T | T | T |
| 0.0934600099999969 | 0.9061499829999988 | 0.1425700039999995 | F | F | F |
| 0.9184399840000026 | 0.6252700089999976 | 0.0803600030000027 | F | F | F |

|                    |                    |                    |   |   |   |
|--------------------|--------------------|--------------------|---|---|---|
| 0.1059939662847559 | 0.4228777285199325 | 0.2731219912559650 | T | T | T |
| 0.4271516165095234 | 0.4207329821270142 | 0.2706928278842264 | T | T | T |
| 0.5815600159999974 | 0.6252700089999976 | 0.0803600030000027 | F | F | F |
| 0.4153711537378696 | 0.8435094616892930 | 0.2471205866039982 | T | T | T |
| 0.5932800169999979 | 0.1555200069999998 | 0.0880500000000026 | F | F | F |
| 0.9067199830000021 | 0.1555200069999998 | 0.0880500000000026 | F | F | F |
| 0.0851234282790909 | 0.8389080187259678 | 0.2467057023926864 | T | T | T |
| 0.9068953096952002 | 0.6324185244504110 | 0.2018222412671453 | T | T | T |
| 0.0824700000000007 | 0.3725399969999970 | 0.1378899959999984 | F | F | F |
| 0.4175299999999993 | 0.3725399969999970 | 0.1378899959999984 | F | F | F |
| 0.5943708207667169 | 0.6372527560553658 | 0.2005660647024399 | T | T | T |
| 0.7500000000000000 | 0.8851100210000027 | 0.1414899979999973 | F | F | F |
| 0.2501907739187117 | 0.1412422775917868 | 0.1999603404367667 | T | T | T |
| 0.7501976883903926 | 0.9143093384648329 | 0.2471930566284154 | T | T | T |
| 0.2500000000000000 | 0.1213599960000025 | 0.0871400010000016 | F | F | F |
| 0.2500000000000000 | 0.6510499720000027 | 0.0816000029999984 | F | F | F |
| 0.7284477130886232 | 0.3473384051444056 | 0.2560196842390464 | T | T | T |
| 0.2512162012085286 | 0.6195419719822816 | 0.1990946964074373 | T | T | T |
| 0.7500000000000000 | 0.3809399900000017 | 0.1380500049999966 | F | F | F |
| 0.2915865605797929 | 0.1284092356768655 | 0.3157206771781456 | T | T | T |
| 0.3139775052786282 | 0.0126833122342496 | 0.3073486696700933 | T | T | T |
| 0.5425840432949304 | 0.3776464387618859 | 0.2717518360596413 | T | T | T |

|                |                |                |
|----------------|----------------|----------------|
| 0.00000000E+00 | 0.00000000E+00 | 0.00000000E+00 |

0.00000000E+00 0.00000000E+00 0.00000000E+00  
0.00000000E+00 0.00000000E+00 0.00000000E+00

**The coordinates of s1b(110) model**

1.0000000000000000  
8.3437995910999998 0.0000000000000000 0.0000000000000000  
0.0000000000000000 8.0254001617000004 0.0000000000000000  
0.0000000000000000 0.0000000000000000 24.8878993987999984

Al O H  
16 25 2

Selective dynamics

Direct

|                    |                    |                    |   |   |   |
|--------------------|--------------------|--------------------|---|---|---|
| 0.0813553901845075 | 0.6149203457941624 | 0.2554904336148235 | T | T | T |
| 0.9246100189999993 | 0.3976500030000025 | 0.0860299989999973 | F | F | F |
| 0.5753899810000007 | 0.3976500030000025 | 0.0860299989999973 | F | F | F |
| 0.4134213156259014 | 0.6285982609524036 | 0.2547875674511329 | T | T | T |
| 0.5808465332742647 | 0.8639374165382897 | 0.1981773663837888 | T | T | T |
| 0.4214699859999982 | 0.1462399959999985 | 0.1417900029999970 | F | F | F |
| 0.0785299989999970 | 0.1462399959999985 | 0.1417900029999970 | F | F | F |
| 0.9192850306244897 | 0.8587730171925668 | 0.1982956954231923 | T | T | T |
| 0.7536347639639197 | 0.1329722210358247 | 0.2423208076958369 | T | T | T |
| 0.2500000000000000 | 0.8851500150000007 | 0.0836400020000028 | F | F | F |
| 0.7500000000000000 | 0.1339599940000014 | 0.1401000019999969 | F | F | F |

|                    |                    |                    |   |   |   |
|--------------------|--------------------|--------------------|---|---|---|
| 0.2487592297067699 | 0.9137149678801664 | 0.2023663562183638 | T | T | T |
| 0.7500000000000000 | 0.7569500210000015 | 0.0822699960000008 | F | F | F |
| 0.2431587207502956 | 0.3295378697752985 | 0.2429864948726512 | T | T | T |
| 0.2500000000000000 | 0.5080299970000013 | 0.1385000049999974 | F | F | F |
| 0.7484001193529202 | 0.4905743637307276 | 0.2047831150906159 | T | T | T |
| 0.4065400060000002 | 0.9061499829999988 | 0.1425700039999995 | F | F | F |
| 0.5894382664043013 | 0.1125384834564978 | 0.1917661225819386 | T | T | T |
| 0.9114808484715192 | 0.1173680642590408 | 0.1921483169034943 | T | T | T |
| 0.093460009999969  | 0.9061499829999988 | 0.1425700039999995 | F | F | F |
| 0.9184399840000026 | 0.6252700089999976 | 0.0803600030000027 | F | F | F |
| 0.0725686673152982 | 0.3969741031922473 | 0.2742874945247649 | T | T | T |
| 0.4275011960847184 | 0.3958922598588038 | 0.2734600739906676 | T | T | T |
| 0.5815600159999974 | 0.6252700089999976 | 0.0803600030000027 | F | F | F |
| 0.4118441145076934 | 0.8540538130469184 | 0.2444170838460573 | T | T | T |
| 0.5932800169999979 | 0.1555200069999998 | 0.0880500000000026 | F | F | F |
| 0.9067199830000021 | 0.1555200069999998 | 0.0880500000000026 | F | F | F |
| 0.0881366892652021 | 0.8450933298786680 | 0.2441643564744403 | T | T | T |
| 0.9109462602649138 | 0.6287215846391185 | 0.2088802409254623 | T | T | T |
| 0.0824700000000007 | 0.3725399969999970 | 0.1378899959999984 | F | F | F |
| 0.4175299999999993 | 0.3725399969999970 | 0.1378899959999984 | F | F | F |
| 0.5863866053207876 | 0.6321882891765036 | 0.2100540524730495 | T | T | T |
| 0.7500000000000000 | 0.8851100210000027 | 0.1414899979999973 | F | F | F |
| 0.2501919754980729 | 0.1495946698014683 | 0.1987884901123271 | T | T | T |
| 0.7514554466397226 | 0.9124906652601191 | 0.2475195228115575 | T | T | T |
| 0.2500000000000000 | 0.1213599960000025 | 0.0871400010000016 | F | F | F |
| 0.2500000000000000 | 0.6510499720000027 | 0.0816000029999984 | F | F | F |
| 0.7225914000505709 | 0.3406440636717720 | 0.2570891105541975 | T | T | T |
| 0.2517612290459252 | 0.5619032914457066 | 0.2074886233241128 | T | T | T |
| 0.7500000000000000 | 0.3809399900000017 | 0.1380500049999966 | F | F | F |
| 0.2548541261209394 | 0.6498853460842109 | 0.3081866537857257 | T | T | T |
| 0.2519674554275712 | 0.5550331639883629 | 0.3325538354963881 | T | T | T |
| 0.5444384303861626 | 0.3557726825610908 | 0.2683676692587131 | T | T | T |

|                |                |                |
|----------------|----------------|----------------|
| 0.00000000E+00 | 0.00000000E+00 | 0.00000000E+00 |

0.00000000E+00 0.00000000E+00 0.00000000E+00  
0.00000000E+00 0.00000000E+00 0.00000000E+00

**The coordinates of s1c(110) model**

1.00000000000000  
8.3437995910999998 0.0000000000000000 0.0000000000000000  
0.0000000000000000 8.0254001617000004 0.0000000000000000  
0.0000000000000000 0.0000000000000000 24.8878993987999984

Al O H  
16 25 2

Selective dynamics

Direct

0.0709632996926307 0.6139606955840093 0.2430159139446462 T T T

|                    |                    |                    |   |   |   |
|--------------------|--------------------|--------------------|---|---|---|
| 0.9246100189999993 | 0.3976500030000025 | 0.0860299989999973 | F | F | F |
| 0.5753899810000007 | 0.3976500030000025 | 0.0860299989999973 | F | F | F |
| 0.4295288787406997 | 0.6183285959697891 | 0.2417855077226319 | T | T | T |
| 0.5831585407930906 | 0.8705551265112965 | 0.1965174858242033 | T | T | T |
| 0.4214699859999982 | 0.1462399959999985 | 0.1417900029999970 | F | F | F |
| 0.0785299989999970 | 0.1462399959999985 | 0.1417900029999970 | F | F | F |
| 0.9180589110307588 | 0.8695825788868834 | 0.1970568467407650 | T | T | T |
| 0.7441284429652991 | 0.1241844074442125 | 0.2518900644937305 | T | T | T |
| 0.2500000000000000 | 0.8851500150000007 | 0.0836400020000028 | F | F | F |
| 0.7500000000000000 | 0.1339599940000014 | 0.1401000019999969 | F | F | F |
| 0.2502848076912204 | 0.8983262291097038 | 0.2024910000957496 | T | T | T |
| 0.7500000000000000 | 0.7569500210000015 | 0.0822699960000008 | F | F | F |
| 0.2558830927093838 | 0.3107589468963168 | 0.2521594592588831 | T | T | T |
| 0.2500000000000000 | 0.5080299970000013 | 0.1385000049999974 | F | F | F |
| 0.7500618625245046 | 0.5016286750115930 | 0.1971835161687110 | T | T | T |
| 0.4065400060000002 | 0.9061499829999988 | 0.1425700039999995 | F | F | F |
| 0.5887403647427648 | 0.1136203651682088 | 0.1928100456504122 | T | T | T |
| 0.9094214129517716 | 0.1173746192467384 | 0.1938451132778527 | T | T | T |
| 0.093460009999969  | 0.9061499829999988 | 0.1425700039999995 | F | F | F |
| 0.9184399840000026 | 0.6252700089999976 | 0.0803600030000027 | F | F | F |
| 0.0901783662833931 | 0.4197681183712302 | 0.2729598335904659 | T | T | T |
| 0.4253235350418358 | 0.4212017280738315 | 0.2717677931118048 | T | T | T |
| 0.5815600159999974 | 0.6252700089999976 | 0.0803600030000027 | F | F | F |
| 0.4155705608520067 | 0.8415807313126970 | 0.2467925081325811 | T | T | T |
| 0.5932800169999979 | 0.1555200069999998 | 0.0880500000000026 | F | F | F |
| 0.9067199830000021 | 0.1555200069999998 | 0.0880500000000026 | F | F | F |
| 0.0858093257378546 | 0.8396136031018323 | 0.2468562262711166 | T | T | T |
| 0.9125088808068419 | 0.6343742980808073 | 0.1983454529405005 | T | T | T |
| 0.0824700000000007 | 0.3725399969999970 | 0.1378899959999984 | F | F | F |
| 0.4175299999999993 | 0.3725399969999970 | 0.1378899959999984 | F | F | F |
| 0.5889723462428377 | 0.6373701920423425 | 0.1974716003004684 | T | T | T |
| 0.7500000000000000 | 0.8851100210000027 | 0.1414899979999973 | F | F | F |
| 0.2516683361542747 | 0.1440240028952869 | 0.2025030750522862 | T | T | T |
| 0.7513222669020316 | 0.8972400890802474 | 0.2432673420438507 | T | T | T |
| 0.2500000000000000 | 0.1213599960000025 | 0.0871400010000016 | F | F | F |
| 0.2500000000000000 | 0.6510499720000027 | 0.0816000029999984 | F | F | F |
| 0.7347685521861105 | 0.3590834669054993 | 0.2509776386827133 | T | T | T |
| 0.2505257683338571 | 0.6091549319335458 | 0.2009326583631977 | T | T | T |
| 0.7500000000000000 | 0.3809399900000017 | 0.1380500049999966 | F | F | F |
| 0.6966319057684011 | 0.1323416512759391 | 0.3200991958686157 | T | T | T |
| 0.6817179258660991 | 0.0229143949633078 | 0.3357790195583975 | T | T | T |
| 0.6322850080500072 | 0.3759774905361719 | 0.2712389600391351 | T | T | T |

0.00000000E+00 0.00000000E+00 0.00000000E+00





1.0000000000000000  
 8.3437995910999998 0.0000000000000000 0.0000000000000000  
 0.0000000000000000 8.0254001617000004 0.0000000000000000  
 0.0000000000000000 0.0000000000000000 24.8878993987999984

Al O H  
 16 26 4

Selective dynamics

Direct

|                    |                    |                    |   |   |   |
|--------------------|--------------------|--------------------|---|---|---|
| 0.0898322641446169 | 0.6120466703686336 | 0.2502632472897309 | T | T | T |
| 0.9246100189999993 | 0.3976500030000025 | 0.0860299989999973 | F | F | F |
| 0.5753899810000007 | 0.3976500030000025 | 0.0860299989999973 | F | F | F |
| 0.4115947742997674 | 0.6157559440850235 | 0.2505170869680327 | T | T | T |
| 0.5851395392413192 | 0.8696341842290213 | 0.1966423634288827 | T | T | T |
| 0.4214699859999982 | 0.1462399959999985 | 0.1417900029999970 | F | F | F |
| 0.0785299989999970 | 0.1462399959999985 | 0.1417900029999970 | F | F | F |
| 0.9196797930952842 | 0.8635468501068265 | 0.2000431034176972 | T | T | T |
| 0.7545389137865147 | 0.1374333774809943 | 0.2421293494886991 | T | T | T |
| 0.2500000000000000 | 0.8851500150000007 | 0.0836400020000028 | F | F | F |
| 0.7500000000000000 | 0.1339599940000014 | 0.1401000019999969 | F | F | F |
| 0.2445291610491659 | 0.8886771836209265 | 0.1971014647205959 | T | T | T |
| 0.7500000000000000 | 0.7569500210000015 | 0.0822699960000008 | F | F | F |
| 0.2483932297676694 | 0.2554598499451343 | 0.2594177470488503 | T | T | T |
| 0.2500000000000000 | 0.5080299970000013 | 0.1385000049999974 | F | F | F |
| 0.7496467230642682 | 0.4947115985449163 | 0.2037323479724063 | T | T | T |
| 0.4065400060000002 | 0.9061499829999988 | 0.1425700039999995 | F | F | F |
| 0.5899615310391143 | 0.1136404073349943 | 0.1919323726224863 | T | T | T |
| 0.9108199295586928 | 0.1167133066490983 | 0.1921774291122389 | T | T | T |
| 0.0934600099999969 | 0.9061499829999988 | 0.1425700039999995 | F | F | F |
| 0.9184399840000026 | 0.6252700089999976 | 0.0803600030000027 | F | F | F |
| 0.0926745773539975 | 0.3958115281451157 | 0.2651564540917297 | T | T | T |
| 0.4243400807170062 | 0.3914205288157117 | 0.2643295479677616 | T | T | T |
| 0.5815600159999974 | 0.6252700089999976 | 0.0803600030000027 | F | F | F |
| 0.4162546639717609 | 0.8639104298972682 | 0.2470901940312743 | T | T | T |
| 0.5932800169999979 | 0.1555200069999998 | 0.0880500000000026 | F | F | F |
| 0.9067199830000021 | 0.1555200069999998 | 0.0880500000000026 | F | F | F |
| 0.0865931344219643 | 0.8507032386045759 | 0.2463367818659823 | T | T | T |
| 0.9116641998848739 | 0.6326880076038588 | 0.2080360179128858 | T | T | T |
| 0.0824700000000007 | 0.3725399969999970 | 0.1378899959999984 | F | F | F |
| 0.4175299999999993 | 0.3725399969999970 | 0.1378899959999984 | F | F | F |
| 0.5876143345884175 | 0.6401554479181256 | 0.2096825586425399 | T | T | T |
| 0.7500000000000000 | 0.8851100210000027 | 0.1414899979999973 | F | F | F |
| 0.2504988450136820 | 0.1349450977861151 | 0.1963492710588935 | T | T | T |
| 0.7497362596244822 | 0.9167406530004218 | 0.2483215109621133 | T | T | T |



```

0.00000000E+00  0.00000000E+00  0.00000000E+00

```

**The coordinates of s2b(110) model**

```

1.0000000000000000
  8.3437995910999998    0.0000000000000000    0.0000000000000000
  0.0000000000000000    8.0254001617000004    0.0000000000000000
  0.0000000000000000    0.0000000000000000    24.8878993987999984

```

```

Al   O   H
 16  26   4

```

Selective dynamics

Direct

```

0.0841855648052192  0.6270113024511315  0.2548905306241897  T  T  T
0.9246100189999993  0.3976500030000025  0.0860299989999973  F  F  F
0.5753899810000007  0.3976500030000025  0.0860299989999973  F  F  F
0.4184222946347593  0.6201417114018729  0.2548281200227245  T  T  T
0.5826465386120699  0.8599620357541375  0.1970697321736367  T  T  T
0.4214699859999982  0.1462399959999985  0.1417900029999970  F  F  F
0.0785299989999970  0.1462399959999985  0.1417900029999970  F  F  F
0.9193491219599075  0.8712996287950024  0.1987810522198341  T  T  T
0.7225893557502002  0.1293548056613232  0.2501669255766760  T  T  T
0.2500000000000000  0.8851500150000007  0.0836400020000028  F  F  F
0.7500000000000000  0.1339599940000014  0.1401000019999969  F  F  F
0.2503276531006308  0.9152169219869716  0.2021086758159636  T  T  T
0.7500000000000000  0.7569500210000015  0.0822699960000008  F  F  F
0.2366773564056255  0.3317585753245445  0.2418554596645580  T  T  T
0.2500000000000000  0.5080299970000013  0.1385000049999974  F  F  F
0.7564483192389833  0.4981540706725582  0.2009572435866714  T  T  T
0.4065400060000002  0.9061499829999988  0.1425700039999995  F  F  F
0.5872556640063086  0.1181747393551281  0.1915828831434654  T  T  T
0.9101607929041974  0.1122740153912436  0.1919819423885604  T  T  T
0.0934600009999969  0.9061499829999988  0.1425700039999995  F  F  F

```





|                    |                    |                    |   |   |   |
|--------------------|--------------------|--------------------|---|---|---|
| 0.5729292560740127 | 0.8694187809805126 | 0.1935114125148644 | T | T | T |
| 0.4214699859999982 | 0.1462399959999985 | 0.1417900029999970 | F | F | F |
| 0.0785299989999970 | 0.1462399959999985 | 0.1417900029999970 | F | F | F |
| 0.9256212391263796 | 0.8659653377065645 | 0.1929590765069010 | T | T | T |
| 0.7617426848393830 | 0.1422043796893680 | 0.2503252516482498 | T | T | T |
| 0.2500000000000000 | 0.8851500150000007 | 0.0836400020000028 | F | F | F |
| 0.7500000000000000 | 0.1339599940000014 | 0.1401000019999969 | F | F | F |
| 0.2496860718024783 | 0.9076410371748581 | 0.2055744772157155 | T | T | T |
| 0.7500000000000000 | 0.7569500210000015 | 0.0822699960000008 | F | F | F |
| 0.2511916521057877 | 0.2806933329792403 | 0.2671986390519584 | T | T | T |
| 0.2500000000000000 | 0.5080299970000013 | 0.1385000049999974 | F | F | F |
| 0.7458544439568442 | 0.5010204260877253 | 0.1973994980735820 | T | T | T |
| 0.4065400060000002 | 0.9061499829999988 | 0.1425700039999995 | F | F | F |
| 0.5937721777078986 | 0.1087287116006880 | 0.1936702164076055 | T | T | T |
| 0.9079580370789082 | 0.1139602208271610 | 0.1935784052141163 | T | T | T |
| 0.0934600099999969 | 0.9061499829999988 | 0.1425700039999995 | F | F | F |
| 0.9184399840000026 | 0.6252700089999976 | 0.0803600030000027 | F | F | F |
| 0.0920853079338396 | 0.4239468557478874 | 0.2718285710472435 | T | T | T |
| 0.4251464009239925 | 0.4179139668074101 | 0.2689126305295255 | T | T | T |
| 0.5815600159999974 | 0.6252700089999976 | 0.0803600030000027 | F | F | F |
| 0.4177509233608027 | 0.8396523836653571 | 0.2468943426832033 | T | T | T |
| 0.5932800169999979 | 0.1555200069999998 | 0.0880500000000026 | F | F | F |
| 0.9067199830000021 | 0.1555200069999998 | 0.0880500000000026 | F | F | F |
| 0.0798508296507540 | 0.8399687556901294 | 0.2466218330988524 | T | T | T |
| 0.9074034799504952 | 0.6354250846971325 | 0.1989861522955974 | T | T | T |
| 0.0824700000000007 | 0.3725399969999970 | 0.1378899959999984 | F | F | F |
| 0.4175299999999993 | 0.3725399969999970 | 0.1378899959999984 | F | F | F |
| 0.5875007823227270 | 0.6398846661363500 | 0.1969697995712371 | T | T | T |
| 0.7500000000000000 | 0.8851100210000027 | 0.1414899979999973 | F | F | F |
| 0.2498392443206823 | 0.1425342219318515 | 0.1993324767960760 | T | T | T |
| 0.7493865978807582 | 0.8981313022459136 | 0.2438452901503003 | T | T | T |
| 0.2500000000000000 | 0.1213599960000025 | 0.0871400010000016 | F | F | F |
| 0.2500000000000000 | 0.6510499720000027 | 0.0816000029999984 | F | F | F |
| 0.7119925046736549 | 0.3628198764331196 | 0.2512890372173505 | T | T | T |
| 0.2481633398951426 | 0.6215477137098481 | 0.1983807678691375 | T | T | T |
| 0.7500000000000000 | 0.3809399900000017 | 0.1380500049999966 | F | F | F |
| 0.8143070554239004 | 0.1037240665923453 | 0.3165165665784693 | T | T | T |
| 0.2624353953995370 | 0.1277733928500939 | 0.3151886557879811 | T | T | T |
| 0.8351795709018303 | 0.1982646393025355 | 0.3396522255447723 | T | T | T |
| 0.1724747173107773 | 0.0530899440554947 | 0.3204469870840838 | T | T | T |
| 0.5840071346670058 | 0.3764431827170010 | 0.2627890655846804 | T | T | T |
| 0.7570834953253200 | 0.8547240271866360 | 0.2803093292616080 | T | T | T |

0.00000000E+00 0.00000000E+00 0.00000000E+00





0.00000000E+00 0.00000000E+00 0.00000000E+00

**The coordinates of s3a(110) model**

1.0000000000000000  
8.3437995910999998 0.0000000000000000 0.0000000000000000  
0.0000000000000000 8.0254001617000004 0.0000000000000000  
0.0000000000000000 0.0000000000000000 24.8878993987999984

Al O H  
16 27 6

Selective dynamics

Direct

|                    |                    |                    |   |   |   |
|--------------------|--------------------|--------------------|---|---|---|
| 0.0882095082292809 | 0.6118385536726566 | 0.2498016684076817 | T | T | T |
| 0.9246100189999993 | 0.3976500030000025 | 0.0860299989999973 | F | F | F |
| 0.5753899810000007 | 0.3976500030000025 | 0.0860299989999973 | F | F | F |
| 0.4113702685557820 | 0.6201399199299257 | 0.2508223093176655 | T | T | T |
| 0.5822701079374099 | 0.8656208045398434 | 0.1989301001550916 | T | T | T |
| 0.4214699859999982 | 0.1462399959999985 | 0.1417900029999970 | F | F | F |
| 0.0785299989999970 | 0.1462399959999985 | 0.1417900029999970 | F | F | F |
| 0.9142003422505641 | 0.8758264289647912 | 0.1970430651104517 | T | T | T |
| 0.7238781986095907 | 0.1341579348227892 | 0.2502072188079885 | T | T | T |
| 0.2500000000000000 | 0.8851500150000007 | 0.0836400020000028 | F | F | F |
| 0.7500000000000000 | 0.1339599940000014 | 0.1401000019999969 | F | F | F |
| 0.2548385814697020 | 0.8905685463402622 | 0.1968253914255639 | T | T | T |
| 0.7500000000000000 | 0.7569500210000015 | 0.0822699960000008 | F | F | F |
| 0.2329317134862529 | 0.2525964067235423 | 0.2596065055467830 | T | T | T |
| 0.2500000000000000 | 0.5080299970000013 | 0.1385000049999974 | F | F | F |
| 0.7561053365322673 | 0.5037338407919344 | 0.1994532277187875 | T | T | T |
| 0.4065400060000002 | 0.9061499829999988 | 0.1425700039999995 | F | F | F |
| 0.5882735263236228 | 0.1180067278823981 | 0.1918512959431040 | T | T | T |
| 0.9099665912806195 | 0.1125822082094245 | 0.1920923729295437 | T | T | T |
| 0.0934600099999969 | 0.9061499829999988 | 0.1425700039999995 | F | F | F |
| 0.9184399840000026 | 0.6252700089999976 | 0.0803600030000027 | F | F | F |
| 0.0740154083596784 | 0.3947770474293463 | 0.2647938764007601 | T | T | T |
| 0.4089903984583089 | 0.3886644411754779 | 0.2685752593070569 | T | T | T |
| 0.5815600159999974 | 0.6252700089999976 | 0.0803600030000027 | F | F | F |
| 0.4141712778418106 | 0.8536143336101545 | 0.2459783964664882 | T | T | T |
| 0.5932800169999979 | 0.1555200069999998 | 0.0880500000000026 | F | F | F |
| 0.9067199830000021 | 0.1555200069999998 | 0.0880500000000026 | F | F | F |
| 0.0854601560371889 | 0.8601732698911427 | 0.2474090017939485 | T | T | T |
| 0.9176346481253408 | 0.6441851048890380 | 0.2066434011703186 | T | T | T |
| 0.0824700000000007 | 0.3725399969999970 | 0.1378899959999984 | F | F | F |
| 0.4175299999999993 | 0.3725399969999970 | 0.1378899959999984 | F | F | F |
| 0.5873501790645222 | 0.6302395677492727 | 0.2087226155823292 | T | T | T |





|                    |                    |                    |   |   |   |
|--------------------|--------------------|--------------------|---|---|---|
| 0.7500000000000000 | 0.1339599940000014 | 0.1401000019999969 | F | F | F |
| 0.2458257381485057 | 0.8903667973851556 | 0.1965849287660876 | T | T | T |
| 0.7500000000000000 | 0.7569500210000015 | 0.0822699960000008 | F | F | F |
| 0.2399058359695989 | 0.2532127187332064 | 0.2595650123465154 | T | T | T |
| 0.2500000000000000 | 0.5080299970000013 | 0.1385000049999974 | F | F | F |
| 0.7571885012005070 | 0.5047224965431729 | 0.1993100169445679 | T | T | T |
| 0.4065400060000002 | 0.9061499829999988 | 0.1425700039999995 | F | F | F |
| 0.5888166529680255 | 0.1179281115611465 | 0.1920255279483189 | T | T | T |
| 0.9092436969686598 | 0.1123465798934250 | 0.1924345768629949 | T | T | T |
| 0.0934600009999969 | 0.9061499829999988 | 0.1425700039999995 | F | F | F |
| 0.9184399840000026 | 0.6252700089999976 | 0.0803600030000027 | F | F | F |
| 0.0829333524476976 | 0.4002564199400954 | 0.2650638800153547 | T | T | T |
| 0.4195336277561034 | 0.3821205165253619 | 0.2668242873301087 | T | T | T |
| 0.5815600159999974 | 0.6252700089999976 | 0.0803600030000027 | F | F | F |
| 0.4168260150490446 | 0.8601306060787092 | 0.2465755539841733 | T | T | T |
| 0.5932800169999979 | 0.1555200069999998 | 0.0880500000000026 | F | F | F |
| 0.9067199830000021 | 0.1555200069999998 | 0.0880500000000026 | F | F | F |
| 0.0900290465630043 | 0.8551368870624870 | 0.2468526726685719 | T | T | T |
| 0.9185920217791204 | 0.6413919006487346 | 0.2056910290998848 | T | T | T |
| 0.0824700000000007 | 0.3725399969999970 | 0.1378899959999984 | F | F | F |
| 0.4175299999999993 | 0.3725399969999970 | 0.1378899959999984 | F | F | F |
| 0.5885095492006157 | 0.6355381297574961 | 0.2092743572664551 | T | T | T |
| 0.7500000000000000 | 0.8851100210000027 | 0.1414899979999973 | F | F | F |
| 0.2491068440234612 | 0.1362332931608466 | 0.1963775275832645 | T | T | T |
| 0.7483350558008207 | 0.9104496331520533 | 0.2465360323404548 | T | T | T |
| 0.2500000000000000 | 0.1213599960000025 | 0.0871400010000016 | F | F | F |
| 0.2500000000000000 | 0.6510499720000027 | 0.0816000029999984 | F | F | F |
| 0.7923687725578720 | 0.3546875935844528 | 0.2503577838350342 | T | T | T |
| 0.2584877877429751 | 0.6262036730662505 | 0.1995400101251368 | T | T | T |
| 0.7500000000000000 | 0.3809399900000017 | 0.1380500049999966 | F | F | F |
| 0.2641488655658424 | 0.6444527628811767 | 0.3042808492218451 | T | T | T |
| 0.2672737472306176 | 0.0917699263584495 | 0.3072363234635042 | T | T | T |
| 0.6134635680185480 | 0.1784648879844656 | 0.3084584907844389 | T | T | T |
| 0.2575071481047217 | 0.5531253579959610 | 0.3298573584353615 | T | T | T |
| 0.1815700338628621 | 0.0080333012965742 | 0.3057630465290489 | T | T | T |
| 0.5463077345748254 | 0.0959477936892875 | 0.3259513523943594 | T | T | T |
| 0.9200403120631309 | 0.3645917843599002 | 0.2583758446869862 | T | T | T |
| 0.5082554097262325 | 0.3087590394597251 | 0.2866251204566158 | T | T | T |
| 0.3877885729575514 | 0.9409410203101053 | 0.2762038211009115 | T | T | T |

|                |                |                |
|----------------|----------------|----------------|
| 0.00000000E+00 | 0.00000000E+00 | 0.00000000E+00 |



0.00000000E+00 0.00000000E+00 0.00000000E+00

**The coordinates of s3c(110) model**

1.0000000000000000

|                    |                    |                     |
|--------------------|--------------------|---------------------|
| 8.3437995910999998 | 0.0000000000000000 | 0.0000000000000000  |
| 0.0000000000000000 | 8.0254001617000004 | 0.0000000000000000  |
| 0.0000000000000000 | 0.0000000000000000 | 24.8878993987999984 |

|    |    |   |
|----|----|---|
| Al | O  | H |
| 16 | 27 | 6 |

Selective dynamics

Direct

|                    |                    |                    |   |   |   |
|--------------------|--------------------|--------------------|---|---|---|
| 0.0808553738607140 | 0.6154052061857537 | 0.2390881282793852 | T | T | T |
| 0.9246100189999993 | 0.3976500030000025 | 0.0860299989999973 | F | F | F |
| 0.5753899810000007 | 0.3976500030000025 | 0.0860299989999973 | F | F | F |
| 0.4527510408101590 | 0.6232684631573135 | 0.2530587896490386 | T | T | T |
| 0.5724970356922324 | 0.8630628538010289 | 0.1914249708461331 | T | T | T |
| 0.4214699859999982 | 0.1462399959999985 | 0.1417900029999970 | F | F | F |
| 0.0785299989999970 | 0.1462399959999985 | 0.1417900029999970 | F | F | F |
| 0.9231953881427399 | 0.8723275346930530 | 0.1957426170872672 | T | T | T |
| 0.7186609436363839 | 0.1394137206747481 | 0.2506103908230042 | T | T | T |
| 0.2500000000000000 | 0.8851500150000007 | 0.0836400020000028 | F | F | F |
| 0.7500000000000000 | 0.1339599940000014 | 0.1401000019999969 | F | F | F |
| 0.2514724809949623 | 0.8969079027462683 | 0.2022640229625671 | T | T | T |
| 0.7500000000000000 | 0.7569500210000015 | 0.0822699960000008 | F | F | F |
| 0.2287408949804383 | 0.2668789493221136 | 0.2627540642433489 | T | T | T |
| 0.2500000000000000 | 0.5080299970000013 | 0.1385000049999974 | F | F | F |
| 0.7518613593039233 | 0.5038282608482018 | 0.1970854315151179 | T | T | T |
| 0.4065400060000002 | 0.9061499829999988 | 0.1425700039999995 | F | F | F |
| 0.5892927614027776 | 0.1140013716314599 | 0.1917666130444156 | T | T | T |
| 0.9037956637409326 | 0.1070236133587416 | 0.1942998466064965 | T | T | T |
| 0.0934600009999969 | 0.9061499829999988 | 0.1425700039999995 | F | F | F |
| 0.9184399840000026 | 0.6252700089999976 | 0.0803600030000027 | F | F | F |
| 0.0731862880289401 | 0.4187137082760535 | 0.2683436824788433 | T | T | T |
| 0.4045267296469225 | 0.4027098269577351 | 0.2703177558954048 | T | T | T |
| 0.5815600159999974 | 0.6252700089999976 | 0.0803600030000027 | F | F | F |
| 0.4190089224455134 | 0.8508953891266877 | 0.2445390192780928 | T | T | T |
| 0.5932800169999979 | 0.1555200069999998 | 0.0880500000000026 | F | F | F |
| 0.9067199830000021 | 0.1555200069999998 | 0.0880500000000026 | F | F | F |
| 0.0850009168459045 | 0.8409552557244356 | 0.2472948610903716 | T | T | T |
| 0.9113593467015227 | 0.6424355267791302 | 0.1982483122566372 | T | T | T |
| 0.0824700000000007 | 0.3725399969999970 | 0.1378899959999984 | F | F | F |
| 0.4175299999999993 | 0.3725399969999970 | 0.1378899959999984 | F | F | F |
| 0.5875014206822686 | 0.6343292349343589 | 0.1968033558798933 | T | T | T |

|                    |                    |                    |   |   |   |
|--------------------|--------------------|--------------------|---|---|---|
| 0.7500000000000000 | 0.8851100210000027 | 0.1414899979999973 | F | F | F |
| 0.2448433026692849 | 0.1399142342973298 | 0.1986262512778072 | T | T | T |
| 0.7455362993477931 | 0.9022447127956402 | 0.2478609913345739 | T | T | T |
| 0.2500000000000000 | 0.1213599960000025 | 0.0871400010000016 | F | F | F |
| 0.2500000000000000 | 0.6510499720000027 | 0.0816000029999984 | F | F | F |
| 0.7839023688308561 | 0.3578424443658915 | 0.2501056881800540 | T | T | T |
| 0.2624195558779753 | 0.6141364776447058 | 0.2020873087485395 | T | T | T |
| 0.7500000000000000 | 0.3809399900000017 | 0.1380500049999966 | F | F | F |
| 0.5951285704796921 | 0.6670523655417202 | 0.3059644302990835 | T | T | T |
| 0.2289558665820329 | 0.1250575923591136 | 0.3145749763356451 | T | T | T |
| 0.5994005132393151 | 0.1699101181498761 | 0.3078896140365768 | T | T | T |
| 0.6368286801694324 | 0.5805587634733894 | 0.3292561685684631 | T | T | T |
| 0.9064398540482959 | 0.3735559115815932 | 0.2617786321174547 | T | T | T |
| 0.1893490848019500 | 0.0128902818449985 | 0.3084447507824616 | T | T | T |
| 0.4885818301930289 | 0.3317057666551739 | 0.2898024060988139 | T | T | T |
| 0.5195235222566901 | 0.0865754276412779 | 0.3179175472671966 | T | T | T |
| 0.7095982926817805 | 0.8204314836749321 | 0.2770450150991009 | T | T | T |

|                |                |                |
|----------------|----------------|----------------|
| 0.00000000E+00 | 0.00000000E+00 | 0.00000000E+00 |





|                    |                    |                    |   |   |   |
|--------------------|--------------------|--------------------|---|---|---|
| 0.7500000000000000 | 0.1339599940000014 | 0.1401000019999969 | F | F | F |
| 0.2452313508584123 | 0.8906332979616517 | 0.1968687619428261 | T | T | T |
| 0.7500000000000000 | 0.7569500210000015 | 0.0822699960000008 | F | F | F |
| 0.2689848517793462 | 0.2529604637046847 | 0.2595752247832108 | T | T | T |
| 0.2500000000000000 | 0.5080299970000013 | 0.1385000049999974 | F | F | F |
| 0.7443197823268457 | 0.5034798813698993 | 0.1995214282430602 | T | T | T |
| 0.4065400060000002 | 0.9061499829999988 | 0.1425700039999995 | F | F | F |
| 0.5901448973429623 | 0.1128286313243116 | 0.1921040548702058 | T | T | T |
| 0.9118542515580165 | 0.1179551755976324 | 0.1917586481070020 | T | T | T |
| 0.0934600009999969 | 0.9061499829999988 | 0.1425700039999995 | F | F | F |
| 0.9184399840000026 | 0.6252700089999976 | 0.0803600030000027 | F | F | F |
| 0.0926478406870115 | 0.3882249818793146 | 0.2685758140714319 | T | T | T |
| 0.4273905060947693 | 0.3956715750300421 | 0.2647984467013753 | T | T | T |
| 0.5815600159999974 | 0.6252700089999976 | 0.0803600030000027 | F | F | F |
| 0.4148864664613482 | 0.8604027560843898 | 0.2473721564718874 | T | T | T |
| 0.5932800169999979 | 0.1555200069999998 | 0.0880500000000026 | F | F | F |
| 0.9067199830000021 | 0.1555200069999998 | 0.0880500000000026 | F | F | F |
| 0.0860434387004322 | 0.8534456090367311 | 0.2460537388411735 | T | T | T |
| 0.9132450190690936 | 0.6298206875872709 | 0.2087970031789550 | T | T | T |
| 0.0824700000000007 | 0.3725399969999970 | 0.1378899959999984 | F | F | F |
| 0.4175299999999993 | 0.3725399969999970 | 0.1378899959999984 | F | F | F |
| 0.5830837272865348 | 0.6443993288168055 | 0.2066693687908065 | T | T | T |
| 0.7500000000000000 | 0.8851100210000027 | 0.1414899979999973 | F | F | F |
| 0.2511602943007528 | 0.1360329307858403 | 0.1967962727305928 | T | T | T |
| 0.7500971256828554 | 0.9101750029822945 | 0.2461281878777717 | T | T | T |
| 0.2500000000000000 | 0.1213599960000025 | 0.0871400010000016 | F | F | F |
| 0.2500000000000000 | 0.6510499720000027 | 0.0816000029999984 | F | F | F |
| 0.7150292523418658 | 0.3528841436679477 | 0.2508287517631994 | T | T | T |
| 0.2511351282581952 | 0.6253718988635105 | 0.1997628984651331 | T | T | T |
| 0.7500000000000000 | 0.3809399900000017 | 0.1380500049999966 | F | F | F |
| 0.2542832367650155 | 0.6452447911074758 | 0.3043683924395741 | T | T | T |
| 0.2927445076988269 | 0.0915610193990526 | 0.3074757109206164 | T | T | T |
| 0.8940432327697415 | 0.1671959074094691 | 0.3089816602083639 | T | T | T |
| 0.2578789463151471 | 0.5532346593521039 | 0.3297500779004115 | T | T | T |
| 0.5870562573089221 | 0.3606339429941013 | 0.2592719866407186 | T | T | T |
| 0.2005977346687449 | 0.0166565837502865 | 0.3095262182954198 | T | T | T |
| 0.3895142439493192 | 0.9445976815798643 | 0.2773645253542666 | T | T | T |
| 0.0053834702289266 | 0.3177925494185238 | 0.2866984956575034 | T | T | T |
| 0.9430001153500469 | 0.0677746691999433 | 0.3238516726708390 | T | T | T |

|                |                |                |
|----------------|----------------|----------------|
| 0.00000000E+00 | 0.00000000E+00 | 0.00000000E+00 |



0.00000000E+00 0.00000000E+00 0.00000000E+00

**The coordinates of s1a(100) model**

1.0000000000000000  
5.5376000404000001 0.0000000000000000 0.0000000000000000  
0.0000000000000000 8.3437995910999998 0.0000000000000000  
0.0000000000000000 0.0000000000000000 21.3780994415000016

Al O H  
16 25 2

Selective dynamics

Direct

|                    |                    |                    |   |   |   |
|--------------------|--------------------|--------------------|---|---|---|
| 0.3450179072710856 | 0.0915578038629060 | 0.3309024551575166 | T | T | T |
| 0.6144000290000022 | 0.9425100090000029 | 0.2470500020000017 | F | F | F |
| 0.6144000290000022 | 0.5932899709999973 | 0.2470500020000017 | F | F | F |
| 0.3546115796572606 | 0.4437883359170529 | 0.3331970941596234 | T | T | T |
| 0.0963116905876642 | 0.6136156394610290 | 0.4231474266540118 | T | T | T |
| 0.8691099879999982 | 0.4393700059999972 | 0.1534200010000006 | F | F | F |
| 0.8691099879999982 | 0.0964300039999983 | 0.1534200010000006 | F | F | F |
| 0.0703430469428060 | 0.9383298459595576 | 0.4212119929034998 | T | T | T |
| 0.3641700149999991 | 0.7678999899999965 | 0.1490000040000012 | F | F | F |
| 0.5848430125535113 | 0.2350791873303545 | 0.4353959777081340 | T | T | T |
| 0.8617600199999984 | 0.7678999899999965 | 0.1487800029999988 | F | F | F |
| 0.0946463030858275 | 0.2727943002134717 | 0.4249000136680036 | T | T | T |
| 0.5830662883638966 | 0.7691010141540434 | 0.3870951639847524 | T | T | T |
| 0.3682200009999974 | 0.2678999899999965 | 0.1971399930000004 | F | F | F |
| 0.8483600019999997 | 0.2678999899999965 | 0.2891800109999991 | F | F | F |
| 0.1114099990000028 | 0.7678999899999965 | 0.2898299989999984 | F | F | F |
| 0.9109661066158323 | 0.4439110490614115 | 0.4529802140326313 | T | T | T |
| 0.0996799990000028 | 0.6113600130000023 | 0.1403300019999989 | F | F | F |
| 0.0996799990000028 | 0.9244400259999992 | 0.1403300019999989 | F | F | F |
| 0.8727453982394227 | 0.1185350217246553 | 0.4402756388707493 | T | T | T |
| 0.5797461398763448 | 0.9343544366721502 | 0.3335805973128083 | T | T | T |
| 0.3746199910000030 | 0.0994599980000004 | 0.2465900030000014 | F | F | F |
| 0.3746199910000030 | 0.4363400040000016 | 0.2465900030000014 | F | F | F |
| 0.5867417404756948 | 0.6028885378387863 | 0.3336421535956583 | T | T | T |
| 0.3353877250254430 | 0.4243354184958123 | 0.4219803400498535 | T | T | T |
| 0.6274499889999987 | 0.6111800070000015 | 0.1561799939999986 | F | F | F |
| 0.6274499889999987 | 0.9246199729999987 | 0.1561799939999986 | F | F | F |
| 0.3207297282743222 | 0.1058254156978048 | 0.4252127058208711 | T | T | T |
| 0.1043742974254059 | 0.9404131667516213 | 0.3374987705291790 | T | T | T |
| 0.8478800059999969 | 0.1003699970000014 | 0.2383099939999980 | F | F | F |
| 0.8478800059999969 | 0.4354299900000029 | 0.2383099939999980 | F | F | F |
| 0.1109554655582666 | 0.5982882951528273 | 0.3392166318103195 | T | T | T |



|                |                |                |
|----------------|----------------|----------------|
| 0.00000000E+00 | 0.00000000E+00 | 0.00000000E+00 |

**The coordinates of s1b(100) model**

|                    |                    |                     |
|--------------------|--------------------|---------------------|
| 1.0000000000000000 |                    |                     |
| 5.537600404000001  | 0.0000000000000000 | 0.0000000000000000  |
| 0.0000000000000000 | 8.3437995910999998 | 0.0000000000000000  |
| 0.0000000000000000 | 0.0000000000000000 | 21.3780994415000016 |

|    |    |   |
|----|----|---|
| Al | O  | H |
| 16 | 25 | 2 |

Selective dynamics

Direct

|                    |                    |                    |   |   |   |
|--------------------|--------------------|--------------------|---|---|---|
| 0.3482623704670835 | 0.0948337732497410 | 0.3287537863849512 | T | T | T |
| 0.6137099860000035 | 0.9423900250000017 | 0.2445400060000011 | F | F | F |
| 0.6137099860000035 | 0.5931699870000031 | 0.2445400060000011 | F | F | F |
| 0.3419784233316276 | 0.4487001427603537 | 0.3309308845744489 | T | T | T |
| 0.0430413729130917 | 0.5883560145133206 | 0.4291571739600703 | T | T | T |
| 0.8684200049999973 | 0.4392499920000006 | 0.1509100050000001 | F | F | F |
| 0.8684200049999973 | 0.0963099969999988 | 0.1509100050000001 | F | F | F |
| 0.0613172630101643 | 0.9382274900098727 | 0.4183577580313091 | T | T | T |
| 0.3634800020000029 | 0.7677800060000024 | 0.1464899930000030 | F | F | F |
| 0.6091039929560342 | 0.2639738578852180 | 0.4233033390442929 | T | T | T |
| 0.8610699769999997 | 0.7677800060000024 | 0.1462700069999983 | F | F | F |
| 0.0950356745807316 | 0.2666447841212668 | 0.4225759293065147 | T | T | T |
| 0.5858631146904835 | 0.7734216459789183 | 0.3822272716970053 | T | T | T |
| 0.3675299880000011 | 0.2677800060000024 | 0.1946299969999998 | F | F | F |
| 0.8476700189999988 | 0.2677800060000024 | 0.2866699989999972 | F | F | F |
| 0.1107200099999971 | 0.7677800060000024 | 0.2873199880000001 | F | F | F |
| 0.8537748676078247 | 0.4097805060004716 | 0.4370516968495712 | T | T | T |
| 0.0989900099999971 | 0.6112400290000011 | 0.1378200050000018 | F | F | F |
| 0.0989900099999971 | 0.9243199829999966 | 0.1378200050000018 | F | F | F |
| 0.8709165811887765 | 0.1118548073984876 | 0.4385751594590811 | T | T | T |
| 0.5848515950968003 | 0.9377723206131622 | 0.3302293478690098 | T | T | T |
| 0.3739300069999985 | 0.0993399990000015 | 0.2440800070000009 | F | F | F |

|                    |                    |                    |   |   |   |
|--------------------|--------------------|--------------------|---|---|---|
| 0.3739300069999985 | 0.4362199899999979 | 0.2440800070000009 | F | F | F |
| 0.5795374114060393 | 0.6049104250864351 | 0.3309261393634143 | T | T | T |
| 0.3356151053776856 | 0.4192695527339884 | 0.4219301270447781 | T | T | T |
| 0.6267600059999978 | 0.6110600230000003 | 0.1536699979999980 | F | F | F |
| 0.6267600059999978 | 0.9244999889999974 | 0.1536699979999980 | F | F | F |
| 0.3383166590359924 | 0.1165683074756989 | 0.4233065572349626 | T | T | T |
| 0.1119092004303321 | 0.9398889677040851 | 0.3358871020827559 | T | T | T |
| 0.8471900219999995 | 0.1002499980000024 | 0.2357999979999974 | F | F | F |
| 0.8471900219999995 | 0.4353100060000017 | 0.2357999979999974 | F | F | F |
| 0.1078258885710221 | 0.6037557773172113 | 0.3421128477705166 | T | T | T |
| 0.8524855925773229 | 0.7710336225683403 | 0.4285108053140831 | T | T | T |
| 0.1035000010000005 | 0.2677800060000024 | 0.1457300040000007 | F | F | F |
| 0.3302840433788263 | 0.7985076306453364 | 0.4359601234709575 | T | T | T |
| 0.6232500079999994 | 0.2677800060000024 | 0.1408399939999967 | F | F | F |
| 0.5901092268453335 | 0.2673684023919939 | 0.3378687857822442 | T | T | T |
| 0.3687900010000007 | 0.7677800060000024 | 0.2343900050000016 | F | F | F |
| 0.1136141257704711 | 0.2684045052429230 | 0.3338673538630432 | T | T | T |
| 0.8477600220000028 | 0.7677800060000024 | 0.2389599979999986 | F | F | F |
| 0.1547563453719803 | 0.6111888722140719 | 0.5101610922552670 | T | T | T |
| 0.0358366120130814 | 0.6541497589105991 | 0.5390032667871416 | T | T | T |
| 0.3085612292918699 | 0.7349211100601742 | 0.4778971078628446 | T | T | T |

|                |                |                |
|----------------|----------------|----------------|
| 0.00000000E+00 | 0.00000000E+00 | 0.00000000E+00 |



|                    |                    |                    |   |   |   |
|--------------------|--------------------|--------------------|---|---|---|
| 0.5856119244628912 | 0.7625137177556787 | 0.3822504018796745 | T | T | T |
| 0.3675299880000011 | 0.2677800060000024 | 0.1946299969999998 | F | F | F |
| 0.8476700189999988 | 0.2677800060000024 | 0.2866699989999972 | F | F | F |
| 0.1107200009999971 | 0.7677800060000024 | 0.2873199880000001 | F | F | F |
| 0.8703216113311827 | 0.4232253157904652 | 0.4387099514077989 | T | T | T |
| 0.0989900009999971 | 0.6112400290000011 | 0.1378200050000018 | F | F | F |
| 0.0989900009999971 | 0.9243199829999966 | 0.1378200050000018 | F | F | F |
| 0.8537301349424015 | 0.1252415722134584 | 0.4368892808350275 | T | T | T |
| 0.5802688929492339 | 0.9310116282434436 | 0.3309565997528394 | T | T | T |
| 0.3739300069999985 | 0.0993399990000015 | 0.2440800070000009 | F | F | F |
| 0.3739300069999985 | 0.4362199899999979 | 0.2440800070000009 | F | F | F |
| 0.5839414490419473 | 0.5982749078644873 | 0.3302285316342479 | T | T | T |
| 0.3371386819910192 | 0.4193851346079894 | 0.4233486606226394 | T | T | T |
| 0.6267600059999978 | 0.6110600230000003 | 0.1536699979999980 | F | F | F |
| 0.6267600059999978 | 0.9244999889999974 | 0.1536699979999980 | F | F | F |
| 0.3359383917880268 | 0.1165968438509677 | 0.4220335296492496 | T | T | T |
| 0.1085193165763064 | 0.9315476646691219 | 0.3421920249647948 | T | T | T |
| 0.8471900219999995 | 0.1002499980000024 | 0.2357999979999974 | F | F | F |
| 0.8471900219999995 | 0.4353100060000017 | 0.2357999979999974 | F | F | F |
| 0.1110656964700507 | 0.5956108421000023 | 0.3358930863890347 | T | T | T |
| 0.8520037671501388 | 0.7640974861477654 | 0.4286414263686883 | T | T | T |
| 0.1035000010000005 | 0.2677800060000024 | 0.1457300040000007 | F | F | F |
| 0.3294789853374542 | 0.7376289857784193 | 0.4359687291819581 | T | T | T |
| 0.6232500079999994 | 0.2677800060000024 | 0.1408399939999967 | F | F | F |
| 0.5900492550133625 | 0.2687430541620388 | 0.3379496066780804 | T | T | T |
| 0.3687900010000007 | 0.7677800060000024 | 0.2343900050000016 | F | F | F |
| 0.1137655676377123 | 0.2671265330705716 | 0.3338442774272618 | T | T | T |
| 0.8477600220000028 | 0.7677800060000024 | 0.2389599979999986 | F | F | F |
| 0.1536868304400737 | 0.9248587899266366 | 0.5103979674601820 | T | T | T |
| 0.3092038652214227 | 0.7996400308276593 | 0.4781382450509145 | T | T | T |
| 0.0339670809010301 | 0.8835929280763596 | 0.5393914396947235 | T | T | T |

|                |                |                |
|----------------|----------------|----------------|
| 0.00000000E+00 | 0.00000000E+00 | 0.00000000E+00 |





|                    |                    |                    |   |   |   |
|--------------------|--------------------|--------------------|---|---|---|
| 0.6137099860000035 | 0.5931699870000031 | 0.2445400060000011 | F | F | F |
| 0.3324730283512352 | 0.4398971187034989 | 0.3307670074626787 | T | T | T |
| 0.0517759421501785 | 0.6044278058034008 | 0.4205439409793698 | T | T | T |
| 0.8684200049999973 | 0.4392499920000006 | 0.1509100050000001 | F | F | F |
| 0.8684200049999973 | 0.0963099969999988 | 0.1509100050000001 | F | F | F |
| 0.0097863132788420 | 0.9301570037441029 | 0.4162293482608453 | T | T | T |
| 0.3634800020000029 | 0.7677800060000024 | 0.1464899930000030 | F | F | F |
| 0.6489115814021331 | 0.2891413114506747 | 0.4240712769362440 | T | T | T |
| 0.8610699769999997 | 0.7677800060000024 | 0.1462700069999983 | F | F | F |
| 0.1343603749173861 | 0.2802925910441219 | 0.4623990876570290 | T | T | T |
| 0.5386383393021753 | 0.7651012512211643 | 0.3843773041229225 | T | T | T |
| 0.3675299880000011 | 0.2677800060000024 | 0.1946299969999998 | F | F | F |
| 0.8476700189999988 | 0.2677800060000024 | 0.2866699989999972 | F | F | F |
| 0.1107200009999971 | 0.7677800060000024 | 0.2873199880000001 | F | F | F |
| 0.8839767567321880 | 0.4285602005267237 | 0.4472767130624318 | T | T | T |
| 0.0989900009999971 | 0.6112400290000011 | 0.1378200050000018 | F | F | F |
| 0.0989900009999971 | 0.9243199829999966 | 0.1378200050000018 | F | F | F |
| 0.9049282462003629 | 0.1234835212175554 | 0.4419876065321656 | T | T | T |
| 0.5663686006126627 | 0.9362201345074003 | 0.3330273334089687 | T | T | T |
| 0.3739300069999985 | 0.0993399990000015 | 0.2440800070000009 | F | F | F |
| 0.3739300069999985 | 0.4362199899999979 | 0.2440800070000009 | F | F | F |
| 0.5663242539684150 | 0.6024509475448957 | 0.3309545112557313 | T | T | T |
| 0.3442175611841759 | 0.4280053427989417 | 0.4233036637126188 | T | T | T |
| 0.6267600059999978 | 0.6110600230000003 | 0.1536699979999980 | F | F | F |
| 0.6267600059999978 | 0.9244999889999974 | 0.1536699979999980 | F | F | F |
| 0.4019424919252585 | 0.1343482631437884 | 0.4396333314957513 | T | T | T |
| 0.0981985374265010 | 0.9429208699300203 | 0.3362720682276865 | T | T | T |
| 0.8471900219999995 | 0.1002499980000024 | 0.2357999979999974 | F | F | F |
| 0.8471900219999995 | 0.4353100060000017 | 0.2357999979999974 | F | F | F |
| 0.0952656377243708 | 0.5987368796733988 | 0.3372475398101349 | T | T | T |
| 0.8115835006203562 | 0.7645267812819275 | 0.4289299005218484 | T | T | T |
| 0.1035000010000005 | 0.2677800060000024 | 0.1457300040000007 | F | F | F |
| 0.2660883010244534 | 0.7811037432920563 | 0.4342178274549023 | T | T | T |
| 0.6232500079999994 | 0.2677800060000024 | 0.1408399939999967 | F | F | F |
| 0.5962759772523953 | 0.2675059356573568 | 0.3404119230247156 | T | T | T |
| 0.3687900010000007 | 0.7677800060000024 | 0.2343900050000016 | F | F | F |
| 0.1214649150274288 | 0.2654457925704968 | 0.3318574669195478 | T | T | T |
| 0.8477600220000028 | 0.7677800060000024 | 0.2389599979999986 | F | F | F |
| 0.2113329135226553 | 0.2725148725969591 | 0.5414527244393913 | T | T | T |
| 0.1078194144520434 | 0.3149170952218787 | 0.5738232340145810 | T | T | T |
| 0.4426657263605502 | 0.0495706944572079 | 0.4692911570688468 | T | T | T |

0.00000000E+00 0.00000000E+00 0.00000000E+00  
0.00000000E+00 0.00000000E+00 0.00000000E+00



1.0000000000000000  
 5.5376000404000001 0.0000000000000000 0.0000000000000000  
 0.0000000000000000 8.3437995910999998 0.0000000000000000  
 0.0000000000000000 0.0000000000000000 21.3780994415000016

Al O H  
 16 26 4

Selective dynamics

Direct

|                    |                    |                    |   |   |   |
|--------------------|--------------------|--------------------|---|---|---|
| 0.3315177894723014 | 0.0954639176660962 | 0.3304216529160284 | T | T | T |
| 0.6144000290000022 | 0.9425100090000029 | 0.2470500020000017 | F | F | F |
| 0.6144000290000022 | 0.5932899709999973 | 0.2470500020000017 | F | F | F |
| 0.3439031687767223 | 0.4393034673920424 | 0.3318047150716475 | T | T | T |
| 0.0709109237613314 | 0.6120722867080725 | 0.4197389579130951 | T | T | T |
| 0.8691099879999982 | 0.4393700059999972 | 0.1534200010000006 | F | F | F |
| 0.8691099879999982 | 0.0964300039999983 | 0.1534200010000006 | F | F | F |
| 0.0781513837550781 | 0.9304325338085087 | 0.4206248889997094 | T | T | T |
| 0.3641700149999991 | 0.7678999899999965 | 0.1490000040000012 | F | F | F |
| 0.6166890113670999 | 0.1937539447595681 | 0.4309276288886641 | T | T | T |
| 0.8617600199999984 | 0.7678999899999965 | 0.1487800029999988 | F | F | F |
| 0.1072798029118161 | 0.2636875703620293 | 0.4504152803490669 | T | T | T |
| 0.5746023602918721 | 0.7682911526142444 | 0.3855285507060388 | T | T | T |
| 0.3682200009999974 | 0.2678999899999965 | 0.1971399930000004 | F | F | F |
| 0.8483600019999997 | 0.2678999899999965 | 0.2891800109999991 | F | F | F |
| 0.1114099990000028 | 0.7678999899999965 | 0.2898299989999984 | F | F | F |
| 0.8901723734039723 | 0.4394503411369650 | 0.4438240140206555 | T | T | T |
| 0.0996799990000028 | 0.6113600130000023 | 0.1403300019999989 | F | F | F |
| 0.0996799990000028 | 0.9244400259999992 | 0.1403300019999989 | F | F | F |
| 0.8908796706793459 | 0.0982729208595448 | 0.4420792192154381 | T | T | T |
| 0.5742024304707325 | 0.9361688283616599 | 0.3338284633029530 | T | T | T |
| 0.3746199910000030 | 0.0994599980000004 | 0.2465900030000014 | F | F | F |
| 0.3746199910000030 | 0.4363400040000016 | 0.2465900030000014 | F | F | F |
| 0.5781134730506285 | 0.5999917041873656 | 0.3338220498978258 | T | T | T |
| 0.3145212216450316 | 0.4409250648393249 | 0.4256625219365564 | T | T | T |
| 0.6274499889999987 | 0.6111800070000015 | 0.1561799939999986 | F | F | F |
| 0.6274499889999987 | 0.9246199729999987 | 0.1561799939999986 | F | F | F |
| 0.3282689232807793 | 0.1002630024810298 | 0.4247960053231509 | T | T | T |
| 0.1004949839606520 | 0.9387549332659562 | 0.3371364974314314 | T | T | T |
| 0.8478800059999969 | 0.1003699970000014 | 0.2383099939999980 | F | F | F |
| 0.8478800059999969 | 0.4354299900000029 | 0.2383099939999980 | F | F | F |
| 0.1050603862281350 | 0.5961572153640873 | 0.3372179422657703 | T | T | T |
| 0.8480964148759228 | 0.7702638543637336 | 0.4303327316493306 | T | T | T |
| 0.1041899989999990 | 0.2678999899999965 | 0.1482400000000013 | F | F | F |
| 0.3042768470018176 | 0.7683822100497618 | 0.4350911341694784 | T | T | T |
| 0.6239399910000003 | 0.2678999899999965 | 0.1433500050000021 | F | F | F |



|                |                |                |
|----------------|----------------|----------------|
| 0.00000000E+00 | 0.00000000E+00 | 0.00000000E+00 |

**The coordinates of s2b(100) model**

|                    |                    |                     |
|--------------------|--------------------|---------------------|
| 1.0000000000000000 |                    |                     |
| 5.5376000404000001 | 0.0000000000000000 | 0.0000000000000000  |
| 0.0000000000000000 | 8.3437995910999998 | 0.0000000000000000  |
| 0.0000000000000000 | 0.0000000000000000 | 21.3780994415000016 |

|    |    |   |
|----|----|---|
| Al | O  | H |
| 16 | 26 | 4 |

Selective dynamics

Direct

|                    |                    |                    |   |   |   |
|--------------------|--------------------|--------------------|---|---|---|
| 0.3426395386897571 | 0.0881514444709641 | 0.3313332481874796 | T | T | T |
| 0.6144000290000022 | 0.9425100090000029 | 0.2470500020000017 | F | F | F |
| 0.6144000290000022 | 0.5932899709999973 | 0.2470500020000017 | F | F | F |
| 0.3569947617672034 | 0.4421898199997256 | 0.3325520247446691 | T | T | T |
| 0.1005090786889011 | 0.6127491696114469 | 0.4217415390700815 | T | T | T |
| 0.8691099879999982 | 0.4393700059999972 | 0.1534200010000006 | F | F | F |
| 0.8691099879999982 | 0.0964300039999983 | 0.1534200010000006 | F | F | F |
| 0.0710955021492074 | 0.9406744050606425 | 0.4274983925805019 | T | T | T |
| 0.3641700149999991 | 0.7678999899999965 | 0.1490000040000012 | F | F | F |
| 0.5835325977166222 | 0.2395723425440759 | 0.4346031200226445 | T | T | T |
| 0.8617600199999984 | 0.7678999899999965 | 0.1487800029999988 | F | F | F |
| 0.0924884394584910 | 0.2727317605316323 | 0.4230414094356351 | T | T | T |
| 0.5916002637577310 | 0.7669477584887933 | 0.3859896851808584 | T | T | T |
| 0.3682200009999974 | 0.2678999899999965 | 0.1971399930000004 | F | F | F |
| 0.8483600019999997 | 0.2678999899999965 | 0.2891800109999991 | F | F | F |
| 0.1114099990000028 | 0.7678999899999965 | 0.2898299989999984 | F | F | F |
| 0.9089832216171576 | 0.4445642155363481 | 0.4516850001803385 | T | T | T |
| 0.0996799990000028 | 0.6113600130000023 | 0.1403300019999989 | F | F | F |
| 0.0996799990000028 | 0.9244400259999992 | 0.1403300019999989 | F | F | F |
| 0.8686630873670422 | 0.1232711871041184 | 0.4391256376564862 | T | T | T |







|                    |                    |                    |   |   |   |
|--------------------|--------------------|--------------------|---|---|---|
| 0.9836764734555367 | 0.5851877081269843 | 0.4262587319504446 | T | T | T |
| 0.8691099879999982 | 0.4393700059999972 | 0.1534200010000006 | F | F | F |
| 0.8691099879999982 | 0.0964300039999983 | 0.1534200010000006 | F | F | F |
| 0.0619961508841102 | 0.9357411111008695 | 0.4205001729773794 | T | T | T |
| 0.3641700149999991 | 0.7678999899999965 | 0.1490000040000012 | F | F | F |
| 0.6296860118486354 | 0.2381112344042196 | 0.4241432754521766 | T | T | T |
| 0.8617600199999984 | 0.7678999899999965 | 0.1487800029999988 | F | F | F |
| 0.1138588770021076 | 0.2542630375252602 | 0.4556560780634782 | T | T | T |
| 0.5706393076100990 | 0.7802537710083838 | 0.3832531027755386 | T | T | T |
| 0.3682200009999974 | 0.2678999899999965 | 0.1971399930000004 | F | F | F |
| 0.8483600019999997 | 0.2678999899999965 | 0.2891800109999991 | F | F | F |
| 0.1114099990000028 | 0.7678999899999965 | 0.2898299989999984 | F | F | F |
| 0.8576560827461913 | 0.3942758514292808 | 0.4401713663111440 | T | T | T |
| 0.0996799990000028 | 0.6113600130000023 | 0.1403300019999989 | F | F | F |
| 0.0996799990000028 | 0.9244400259999992 | 0.1403300019999989 | F | F | F |
| 0.8758193502688204 | 0.0994179034249792 | 0.4466296794845284 | T | T | T |
| 0.5781463054653644 | 0.9414379546973543 | 0.3319879682115390 | T | T | T |
| 0.3746199910000030 | 0.0994599980000004 | 0.2465900030000014 | F | F | F |
| 0.3746199910000030 | 0.4363400040000016 | 0.2465900030000014 | F | F | F |
| 0.5749694617412910 | 0.6040117734941294 | 0.3350672721970160 | T | T | T |
| 0.3719775015207732 | 0.4019659310959427 | 0.4289448106727477 | T | T | T |
| 0.6274499889999987 | 0.6111800070000015 | 0.1561799939999986 | F | F | F |
| 0.6274499889999987 | 0.9246199729999987 | 0.1561799939999986 | F | F | F |
| 0.3395865854285008 | 0.1115300440920517 | 0.4237218681268398 | T | T | T |
| 0.1052823322148743 | 0.9382346292999428 | 0.3380634478053484 | T | T | T |
| 0.8478800059999969 | 0.1003699970000014 | 0.2383099939999980 | F | F | F |
| 0.8478800059999969 | 0.4354299900000029 | 0.2383099939999980 | F | F | F |
| 0.1088003082730940 | 0.6014459991948653 | 0.3465801866779263 | T | T | T |
| 0.8360288687241902 | 0.7732808821699014 | 0.4293780680902145 | T | T | T |
| 0.1041899989999990 | 0.2678999899999965 | 0.1482400000000013 | F | F | F |
| 0.3290935681600280 | 0.8076014875428806 | 0.4395264082634602 | T | T | T |
| 0.6239399910000003 | 0.2678999899999965 | 0.1433500050000021 | F | F | F |
| 0.5919542500971677 | 0.2655368655627633 | 0.3402261606334541 | T | T | T |
| 0.3694800139999970 | 0.7678999899999965 | 0.2369000019999987 | F | F | F |
| 0.1180713161372046 | 0.2717826304328192 | 0.3344922211799365 | T | T | T |
| 0.8484500049999966 | 0.7678999899999965 | 0.2414699939999991 | F | F | F |
| 0.1532538582718992 | 0.5981730072056540 | 0.5000039429013303 | T | T | T |
| 0.1908273653939823 | 0.2841733830922991 | 0.5355404728729555 | T | T | T |
| 0.3720001114112335 | 0.4896061093794653 | 0.4606332807004938 | T | T | T |
| 0.1462754966017333 | 0.5055519428320512 | 0.5288887388660320 | T | T | T |
| 0.1111402579115832 | 0.2225697501117636 | 0.5678395467769662 | T | T | T |
| 0.3062900098870140 | 0.7327845106745366 | 0.4768576021995635 | T | T | T |

0.00000000E+00 0.00000000E+00 0.00000000E+00



0.00000000E+00 0.00000000E+00 0.00000000E+00

**The coordinates of s2d(100) model**

1.0000000000000000

|                    |                    |                     |
|--------------------|--------------------|---------------------|
| 5.5376000404000001 | 0.0000000000000000 | 0.0000000000000000  |
| 0.0000000000000000 | 8.3437995910999998 | 0.0000000000000000  |
| 0.0000000000000000 | 0.0000000000000000 | 21.3780994415000016 |

|    |    |   |
|----|----|---|
| Al | O  | H |
| 16 | 26 | 4 |

Selective dynamics

Direct

|                    |                    |                    |   |   |   |
|--------------------|--------------------|--------------------|---|---|---|
| 0.3434458427110548 | 0.0935056721817244 | 0.3283863976620587 | T | T | T |
| 0.6137099860000035 | 0.9423900250000017 | 0.2445400060000011 | F | F | F |
| 0.6137099860000035 | 0.5931699870000031 | 0.2445400060000011 | F | F | F |
| 0.3534809858245285 | 0.4411712455966519 | 0.3301269670281202 | T | T | T |
| 0.8528441356807979 | 0.5825350967216980 | 0.3859566216602294 | T | T | T |
| 0.8684200049999973 | 0.4392499920000006 | 0.1509100050000001 | F | F | F |
| 0.8684200049999973 | 0.0963099969999988 | 0.1509100050000001 | F | F | F |
| 0.1453251828135620 | 0.9146077247227599 | 0.4352153511427490 | T | T | T |
| 0.3634800020000029 | 0.7677800060000024 | 0.1464899930000030 | F | F | F |
| 0.5884647101758750 | 0.2556399097391876 | 0.4419300078612842 | T | T | T |
| 0.8610699769999997 | 0.7677800060000024 | 0.1462700069999983 | F | F | F |
| 0.0682550775944710 | 0.2527609047730069 | 0.4200733297220069 | T | T | T |
| 0.6803223640078411 | 0.9109677366347623 | 0.4050926163585751 | T | T | T |
| 0.3675299880000011 | 0.2677800060000024 | 0.1946299969999998 | F | F | F |
| 0.8476700189999988 | 0.2677800060000024 | 0.2866699989999972 | F | F | F |
| 0.1107200009999971 | 0.7677800060000024 | 0.2873199880000001 | F | F | F |
| 0.8435703716017307 | 0.4048556023576814 | 0.4331377449195937 | T | T | T |
| 0.0989900009999971 | 0.6112400290000011 | 0.1378200050000018 | F | F | F |
| 0.0989900009999971 | 0.9243199829999966 | 0.1378200050000018 | F | F | F |
| 0.8359479430432922 | 0.0924123912667872 | 0.4311779656973955 | T | T | T |
| 0.5929352315789812 | 0.9441633793152512 | 0.3290682999897923 | T | T | T |
| 0.3739300069999985 | 0.0993399990000015 | 0.2440800070000009 | F | F | F |
| 0.3739300069999985 | 0.4362199899999979 | 0.2440800070000009 | F | F | F |
| 0.6052632191336452 | 0.5879146105664308 | 0.3327040843066015 | T | T | T |
| 0.3302962756801929 | 0.4108859810005469 | 0.4239099502386588 | T | T | T |
| 0.6267600059999978 | 0.6110600230000003 | 0.1536699979999980 | F | F | F |
| 0.6267600059999978 | 0.9244999889999974 | 0.1536699979999980 | F | F | F |
| 0.3255450626732598 | 0.1110613899057062 | 0.4197041235464075 | T | T | T |
| 0.1274421392203594 | 0.9263668241514504 | 0.3427636675266777 | T | T | T |
| 0.8471900219999995 | 0.1002499980000024 | 0.2357999979999974 | F | F | F |
| 0.8471900219999995 | 0.4353100060000017 | 0.2357999979999974 | F | F | F |
| 0.1090387142145000 | 0.5920128671107181 | 0.3351178607121407 | T | T | T |



0.00000000E+00 0.00000000E+00 0.00000000E+00  
0.00000000E+00 0.00000000E+00 0.00000000E+00

**The coordinates of s3a(100) model**

1.0000000000000000  
5.5376000404000001 0.0000000000000000 0.0000000000000000  
0.0000000000000000 8.3437995910999998 0.0000000000000000  
0.0000000000000000 0.0000000000000000 21.3780994415000016  
Al O H  
16 27 6

Selective dynamics

Direct

0.3375388470151111 0.0957241217547260 0.3301677291447319 T T T  
0.6144000290000022 0.9425100090000029 0.2470500020000017 F F F  
0.6144000290000022 0.5932899709999973 0.2470500020000017 F F F  
0.3427186098531904 0.4451035255537183 0.3319440920424899 T T T  
0.0747168677340617 0.6133766307811737 0.4268891206021351 T T T  
0.8691099879999982 0.4393700059999972 0.1534200010000006 F F F  
0.8691099879999982 0.0964300039999983 0.1534200010000006 F F F  
0.0788481766275680 0.9296174738062337 0.4188024442675917 T T T  
0.3641700149999991 0.7678999899999965 0.1490000040000012 F F F  
0.6199729918026764 0.1990220602842145 0.4299532199554973 T T T  
0.8617600199999984 0.7678999899999965 0.1487800029999988 F F F  
0.1041978552352234 0.2637071266112161 0.4390853625429315 T T T  
0.5784812893060487 0.7699651261262529 0.3846221536471359 T T T  
0.3682200009999974 0.2678999899999965 0.1971399930000004 F F F  
0.8483600019999997 0.2678999899999965 0.2891800109999991 F F F  
0.1114099990000028 0.7678999899999965 0.2898299989999984 F F F

|                    |                    |                    |   |   |   |
|--------------------|--------------------|--------------------|---|---|---|
| 0.8703537253265314 | 0.4297732964660402 | 0.4343953004878898 | T | T | T |
| 0.0996799990000028 | 0.6113600130000023 | 0.1403300019999989 | F | F | F |
| 0.0996799990000028 | 0.9244400259999992 | 0.1403300019999989 | F | F | F |
| 0.8906198750177925 | 0.0972972243367053 | 0.4402335738184341 | T | T | T |
| 0.5781606011249908 | 0.9371697430308906 | 0.3330057364577623 | T | T | T |
| 0.3746199910000030 | 0.0994599980000004 | 0.2465900030000014 | F | F | F |
| 0.3746199910000030 | 0.4363400040000016 | 0.2465900030000014 | F | F | F |
| 0.5798857398062460 | 0.6013315386544420 | 0.3330652857464028 | T | T | T |
| 0.3186695396419489 | 0.4400588808313030 | 0.4247021357058058 | T | T | T |
| 0.6274499889999987 | 0.6111800070000015 | 0.1561799939999986 | F | F | F |
| 0.6274499889999987 | 0.9246199729999987 | 0.1561799939999986 | F | F | F |
| 0.3321396914058376 | 0.1022873195436418 | 0.4237624822572527 | T | T | T |
| 0.1030438050677782 | 0.9417549949406648 | 0.3357256701172835 | T | T | T |
| 0.8478800059999969 | 0.1003699970000014 | 0.2383099939999980 | F | F | F |
| 0.8478800059999969 | 0.4354299900000029 | 0.2383099939999980 | F | F | F |
| 0.1078648256701602 | 0.6010043524237363 | 0.3405315424775516 | T | T | T |
| 0.8492662713174243 | 0.7727416460233520 | 0.4294987014792467 | T | T | T |
| 0.1041899989999990 | 0.2678999899999965 | 0.1482400000000013 | F | F | F |
| 0.3124053388897380 | 0.7756796981085092 | 0.4343137462148240 | T | T | T |
| 0.6239399910000003 | 0.2678999899999965 | 0.1433500050000021 | F | F | F |
| 0.5928283592804935 | 0.2626443762532409 | 0.3454177355253387 | T | T | T |
| 0.3694800139999970 | 0.7678999899999965 | 0.2369000019999987 | F | F | F |
| 0.1153644773221578 | 0.2714626000128345 | 0.3393204851664328 | T | T | T |
| 0.8484500049999966 | 0.7678999899999965 | 0.2414699939999991 | F | F | F |
| 0.5922284555525118 | 0.2975259796719031 | 0.5053413127094215 | T | T | T |
| 0.1330559402682239 | 0.2903323107551518 | 0.5259383024890957 | T | T | T |
| 0.0982199104893591 | 0.5943595014034925 | 0.5214826820970209 | T | T | T |
| 0.4417938507362173 | 0.2760193426801832 | 0.5288853726624307 | T | T | T |
| 0.7891812523046788 | 0.4313088746336438 | 0.4757860503384620 | T | T | T |
| 0.9962001530441761 | 0.2417330758365837 | 0.5472879604923461 | T | T | T |
| 0.4454011439225525 | 0.4387723036176123 | 0.4578460173329226 | T | T | T |
| 0.1202493209280533 | 0.4737385103336780 | 0.5327050708752675 | T | T | T |
| 0.2379520530154006 | 0.6554074785052691 | 0.5355153119283134 | T | T | T |

|                |                |                |
|----------------|----------------|----------------|
| 0.00000000E+00 | 0.00000000E+00 | 0.00000000E+00 |



|                    |                    |                     |   |   |   |
|--------------------|--------------------|---------------------|---|---|---|
| 0.0000000000000000 | 8.3437995910999998 | 0.0000000000000000  |   |   |   |
| 0.0000000000000000 | 0.0000000000000000 | 21.3780994415000016 |   |   |   |
| Al                 | O                  | H                   |   |   |   |
| 16                 | 27                 | 6                   |   |   |   |
| Selective dynamics |                    |                     |   |   |   |
| Direct             |                    |                     |   |   |   |
| 0.3310708107026491 | 0.0943702148551907 | 0.3304571236111583  | T | T | T |
| 0.6144000290000022 | 0.9425100090000029 | 0.2470500020000017  | F | F | F |
| 0.6144000290000022 | 0.5932899709999973 | 0.2470500020000017  | F | F | F |
| 0.3325341996564771 | 0.4408844832871700 | 0.3310711843872702  | T | T | T |
| 0.0275395681951424 | 0.6018901161116921 | 0.4293437554882057  | T | T | T |
| 0.8691099879999982 | 0.4393700059999972 | 0.1534200010000006  | F | F | F |
| 0.8691099879999982 | 0.0964300039999983 | 0.1534200010000006  | F | F | F |
| 0.0296912671485049 | 0.9349849093076098 | 0.4308661934234647  | T | T | T |
| 0.3641700149999991 | 0.7678999899999965 | 0.1490000040000012  | F | F | F |
| 0.6445012458035907 | 0.2683516571086938 | 0.4230917044523681  | T | T | T |
| 0.8617600199999984 | 0.7678999899999965 | 0.1487800029999988  | F | F | F |
| 0.1089631742544645 | 0.2680426616435627 | 0.4592908606229889  | T | T | T |
| 0.5794702312486454 | 0.7687875474255398 | 0.3786033955727895  | T | T | T |
| 0.3682200009999974 | 0.2678999899999965 | 0.1971399930000004  | F | F | F |
| 0.8483600019999997 | 0.2678999899999965 | 0.2891800109999991  | F | F | F |
| 0.1114099990000028 | 0.7678999899999965 | 0.2898299989999984  | F | F | F |
| 0.8718599227411948 | 0.4165928338790002 | 0.4399514686869310  | T | T | T |
| 0.0996799990000028 | 0.6113600130000023 | 0.1403300019999989  | F | F | F |
| 0.0996799990000028 | 0.9244400259999992 | 0.1403300019999989  | F | F | F |
| 0.8737093378960489 | 0.1219136157587132 | 0.4389370377363991  | T | T | T |
| 0.5771595735692455 | 0.9397871708882084 | 0.3319124718973176  | T | T | T |
| 0.3746199910000030 | 0.0994599980000004 | 0.2465900030000014  | F | F | F |
| 0.3746199910000030 | 0.4363400040000016 | 0.2465900030000014  | F | F | F |
| 0.5775639797502581 | 0.5969402296494168 | 0.3320248027269359  | T | T | T |
| 0.3717761034273780 | 0.4118400031646017 | 0.4309827534557423  | T | T | T |
| 0.6274499889999987 | 0.6111800070000015 | 0.1561799939999986  | F | F | F |
| 0.6274499889999987 | 0.9246199729999987 | 0.1561799939999986  | F | F | F |
| 0.3718987306346092 | 0.1217082718910809 | 0.4340630830279674  | T | T | T |
| 0.1057669909628293 | 0.9358038769349000 | 0.3441517455897160  | T | T | T |
| 0.8478800059999969 | 0.1003699970000014 | 0.2383099939999980  | F | F | F |
| 0.8478800059999969 | 0.4354299900000029 | 0.2383099939999980  | F | F | F |
| 0.1051240072294656 | 0.5995339954518921 | 0.3437803787047806  | T | T | T |
| 0.8244713519266222 | 0.7682764689431125 | 0.4306509852478714  | T | T | T |
| 0.1041899989999990 | 0.2678999899999965 | 0.1482400000000013  | F | F | F |
| 0.3217579999287068 | 0.7703659685163956 | 0.4289622039984970  | T | T | T |
| 0.6239399910000003 | 0.2678999899999965 | 0.1433500050000021  | F | F | F |
| 0.5868241602743308 | 0.2670879709297463 | 0.3402109926354487  | T | T | T |
| 0.3694800139999970 | 0.7678999899999965 | 0.2369000019999987  | F | F | F |





```

0.00000000E+00 0.00000000E+00 0.00000000E+00

```

**The coordinates of s4a(100) model**

```

1.0000000000000000
  5.5376000404000001  0.0000000000000000  0.0000000000000000
  0.0000000000000000  8.3437995910999998  0.0000000000000000
  0.0000000000000000  0.0000000000000000  21.3780994415000016

```

```

Al   O   H
 16  28   8

```

Selective dynamics

Direct

```

0.3419133660431449 0.0955445747438356 0.3270950039232732  T  T  T
0.6124699710000030 0.9440600280000027 0.2428800019999997  F  F  F
0.6124699710000030 0.5948399899999970 0.2428800019999997  F  F  F
0.3420485917049098 0.4427096064029322 0.3272741716114508  T  T  T
0.0253998553686031 0.6049122720803193 0.4225260485378099  T  T  T
0.8671799899999968 0.4409199950000016 0.1492500009999986  F  F  F
0.8671799899999968 0.0979799999999997 0.1492500009999986  F  F  F
0.0226276950971983 0.9373000895247817 0.4232626688124413  T  T  T
0.3622399870000024 0.7694500090000034 0.1448300030000027  F  F  F
0.6280965717909274 0.2726226074726745 0.4292506117659004  T  T  T
0.8598300219999970 0.7694500090000034 0.1446100029999968  F  F  F
0.0931418135982663 0.2697719038405154 0.4320541757788480  T  T  T
0.5750808482584941 0.7697185145628899 0.3740741476558320  T  T  T
0.3662900030000031 0.2694500090000034 0.1929699929999984  F  F  F
0.8464300039999983 0.2694500090000034 0.2850100100000006  F  F  F
0.1094800010000014 0.7694500090000034 0.2856599990000035  F  F  F

```

|                    |                    |                    |   |   |   |
|--------------------|--------------------|--------------------|---|---|---|
| 0.8656333340578671 | 0.4232712196182862 | 0.4294506200837213 | T | T | T |
| 0.0977500010000014 | 0.6129099730000007 | 0.1361600010000004 | F | F | F |
| 0.0977500010000014 | 0.9259899850000011 | 0.1361600010000004 | F | F | F |
| 0.8621958197369846 | 0.1196378090163521 | 0.4265533535151865 | T | T | T |
| 0.5805481874911367 | 0.9394700930762634 | 0.3271701904602142 | T | T | T |
| 0.3726899919999980 | 0.1010100020000024 | 0.2424200029999994 | F | F | F |
| 0.3726899919999980 | 0.4378899929999989 | 0.2424200029999994 | F | F | F |
| 0.5802523293128048 | 0.5994340157936875 | 0.3274384386681779 | T | T | T |
| 0.3534479904885892 | 0.4191326496992697 | 0.4231444912166398 | T | T | T |
| 0.6255199909999973 | 0.6127300260000013 | 0.1520099939999966 | F | F | F |
| 0.6255199909999973 | 0.9261699910000019 | 0.1520099939999966 | F | F | F |
| 0.3529167643479336 | 0.1158634284962240 | 0.4220598383126121 | T | T | T |
| 0.1097346969758784 | 0.9362399115380936 | 0.3383606590085929 | T | T | T |
| 0.8459500069999990 | 0.1019200010000034 | 0.2341399940000031 | F | F | F |
| 0.8459500069999990 | 0.4369800090000027 | 0.2341399940000031 | F | F | F |
| 0.1099847036266418 | 0.6020997258174781 | 0.3383178257413789 | T | T | T |
| 0.8215510579559226 | 0.7698024549103633 | 0.4253444602783211 | T | T | T |
| 0.1022600009999977 | 0.2694500090000034 | 0.1440699990000027 | F | F | F |
| 0.3191428500804682 | 0.7727874022057242 | 0.4258587121815931 | T | T | T |
| 0.6220099929999989 | 0.2694500090000034 | 0.1391800050000001 | F | F | F |
| 0.5847918035480979 | 0.2706252742144193 | 0.3379089188540607 | T | T | T |
| 0.3675499860000002 | 0.7694500090000034 | 0.2327300010000002 | F | F | F |
| 0.1196923652447705 | 0.2694188291233617 | 0.3349167393727596 | T | T | T |
| 0.8465200070000023 | 0.7694500090000034 | 0.2372999939999971 | F | F | F |
| 0.1304091201616205 | 0.2538132708778311 | 0.5224314339764932 | T | T | T |
| 0.1179568694235974 | 0.9525630076301266 | 0.5066113378519101 | T | T | T |
| 0.1583651359614675 | 0.5979712097022402 | 0.5032778524063587 | T | T | T |
| 0.5699884181762950 | 0.2687384829696748 | 0.5145213077519737 | T | T | T |
| 0.1020499652708489 | 0.1337567712557323 | 0.5290724787425644 | T | T | T |
| 0.3410723740376769 | 0.4903526302150443 | 0.4626439752074227 | T | T | T |
| 0.3603592247693331 | 0.7599839974624705 | 0.4702317761106818 | T | T | T |
| 0.1103705006041823 | 0.8526061805102204 | 0.5301249977730396 | T | T | T |
| 0.0843586020594162 | 0.5198455043782241 | 0.5311043125313697 | T | T | T |
| 0.3743561815777710 | 0.0454170979500380 | 0.4591064228087071 | T | T | T |
| 0.7082007138034468 | 0.2742059755052720 | 0.5421926168387965 | T | T | T |
| 0.3209836793531718 | 0.2651490585099750 | 0.5299831495563924 | T | T | T |

|                |                |                |
|----------------|----------------|----------------|
| 0.00000000E+00 | 0.00000000E+00 | 0.00000000E+00 |



0.00000000E+00 0.00000000E+00 0.00000000E+00

### Reference

1. A. Zecchina, P. Escalona, C. Otero Areán, J. Catal. 107 (1987) 244.
2. Gribov, E. N.; Zavorotynska, O.; Agostini, G.; Vitillo, J. G.; Ricchiardi, G.; Spoto, G.; Zecchina, A. Phys. Chem. Chem. Phys. 2010,12, 6474–6482.
